# Supplementary material for: Adolescent and caregiver preferences for juvenile idiopathic arthritis treatment: a discrete-choice experiment
Source: PubMed Central journal article supplement (PMC10589988; doi:10.1186/s12969-023-00906-8), 2023-10-21
Supplement: 12969_2023_906_MOESM1_ESM.pdf [file 12969_2023_906_MOESM1_ESM.pdf]

## **SUPPLEMENTAL APPENDIX**

### **Appendix A: Subgroup Analyses, US Sample**

**Figure S1. Preference Weights and Conditional Relative Importance Estimates: Adolescents Younger Than Median Age Versus Adolescents at or Older Than Median Age**

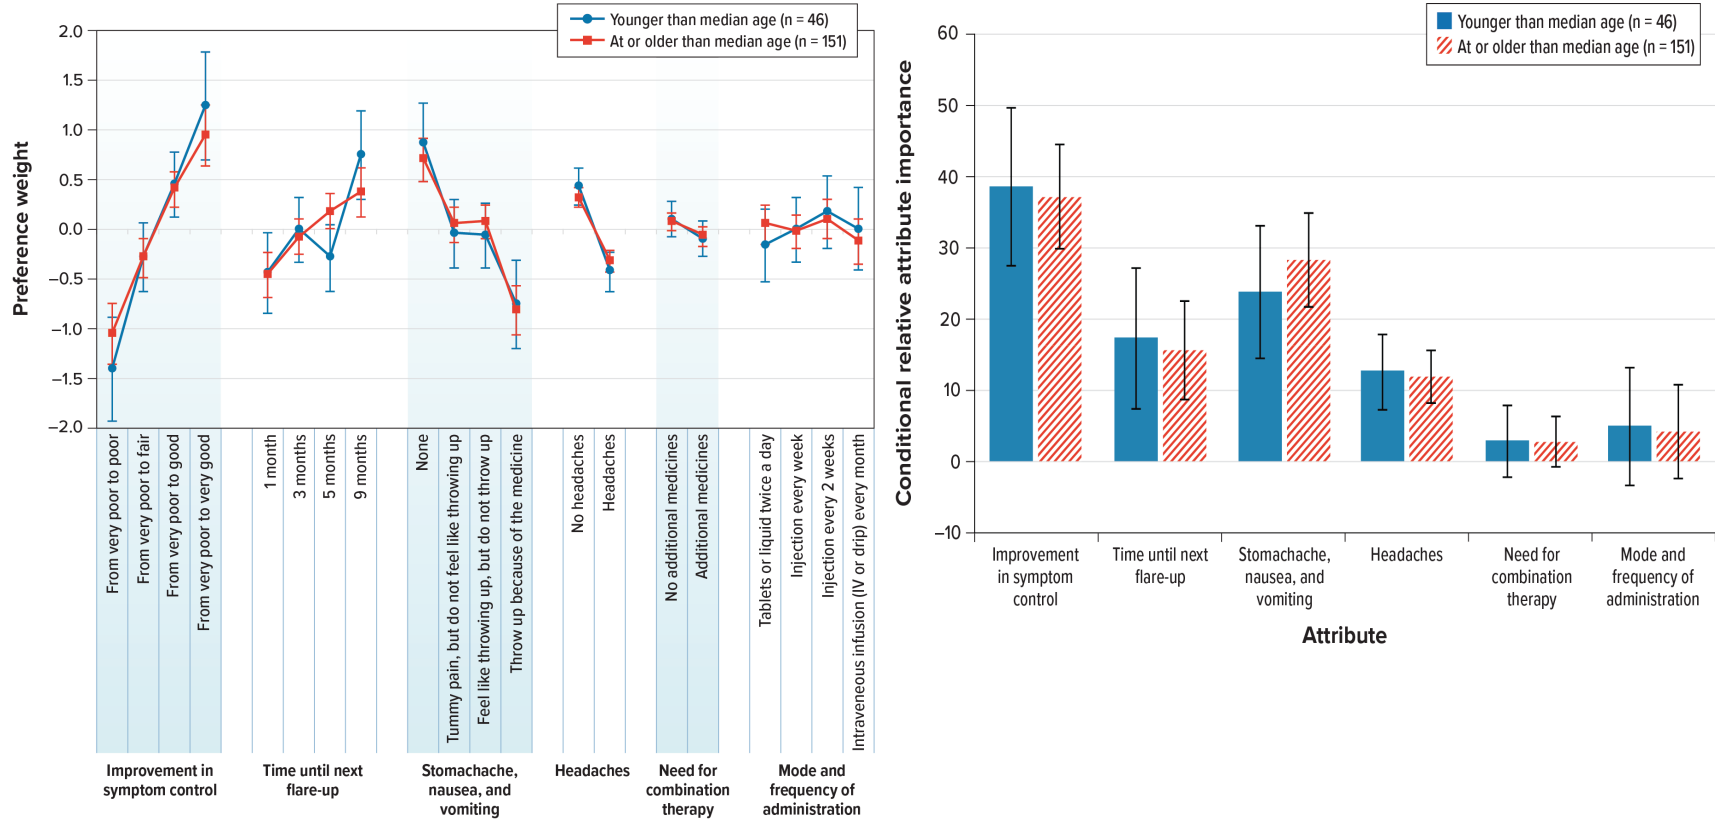

IV = intravenous.

**Figure S2. Preference Weights and Conditional Relative Importance Estimates: Adolescents Who Identify as Female Versus Adolescents Who Do Not Identify as Female**

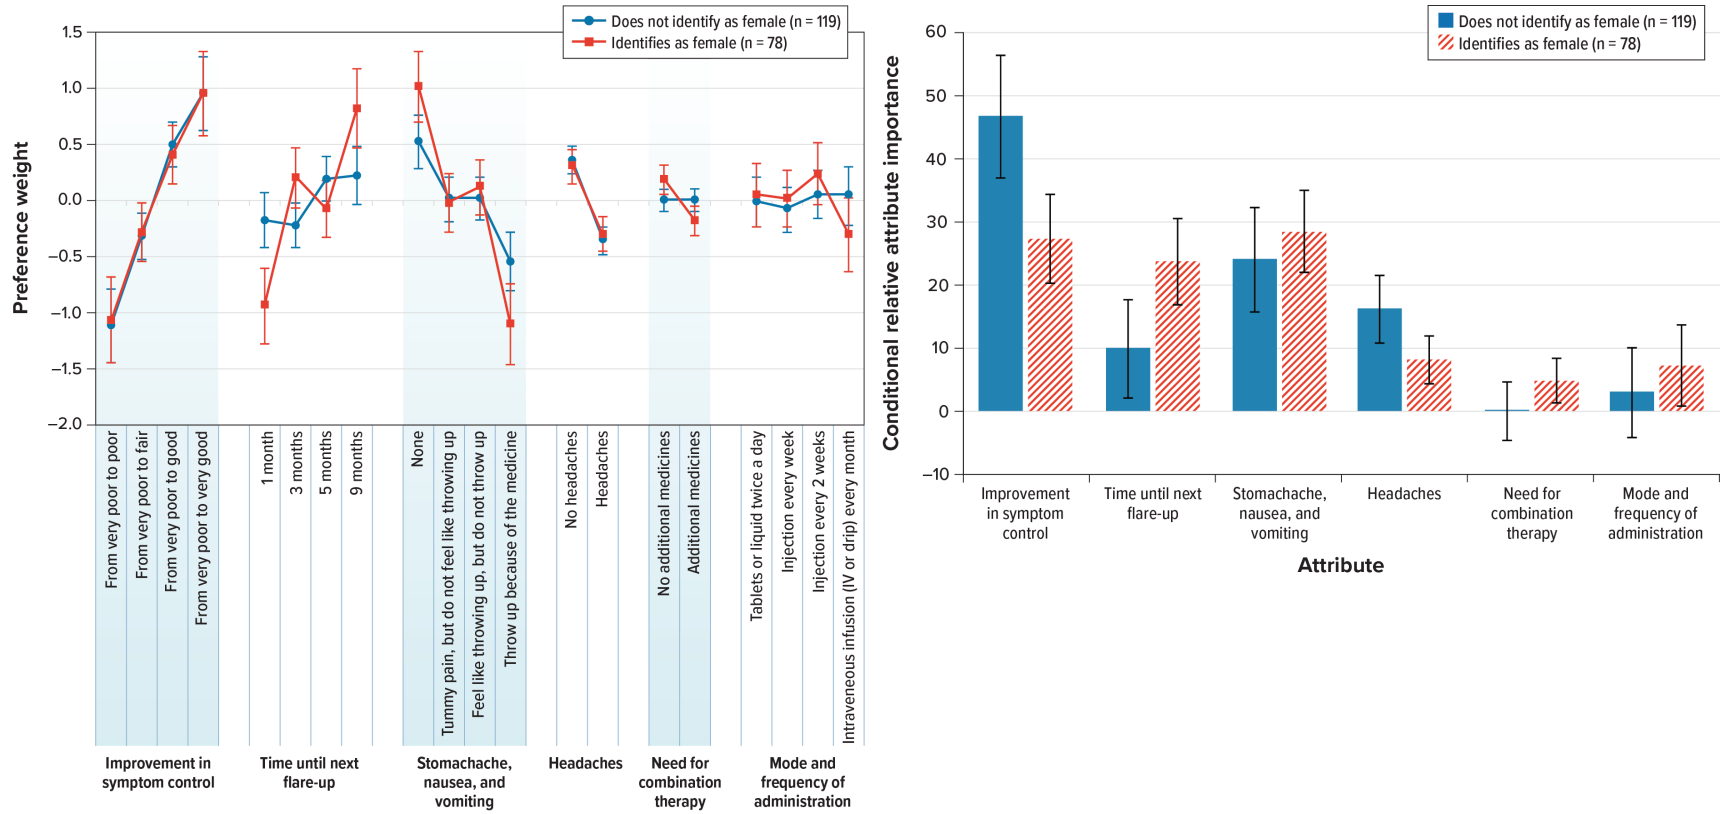

IV = intravenous.

**Figure S3. Preference Weights and Conditional Relative Importance Estimates: Adolescents With Methotrexate Experience Versus Adolescents With No Experience With Methotrexate**

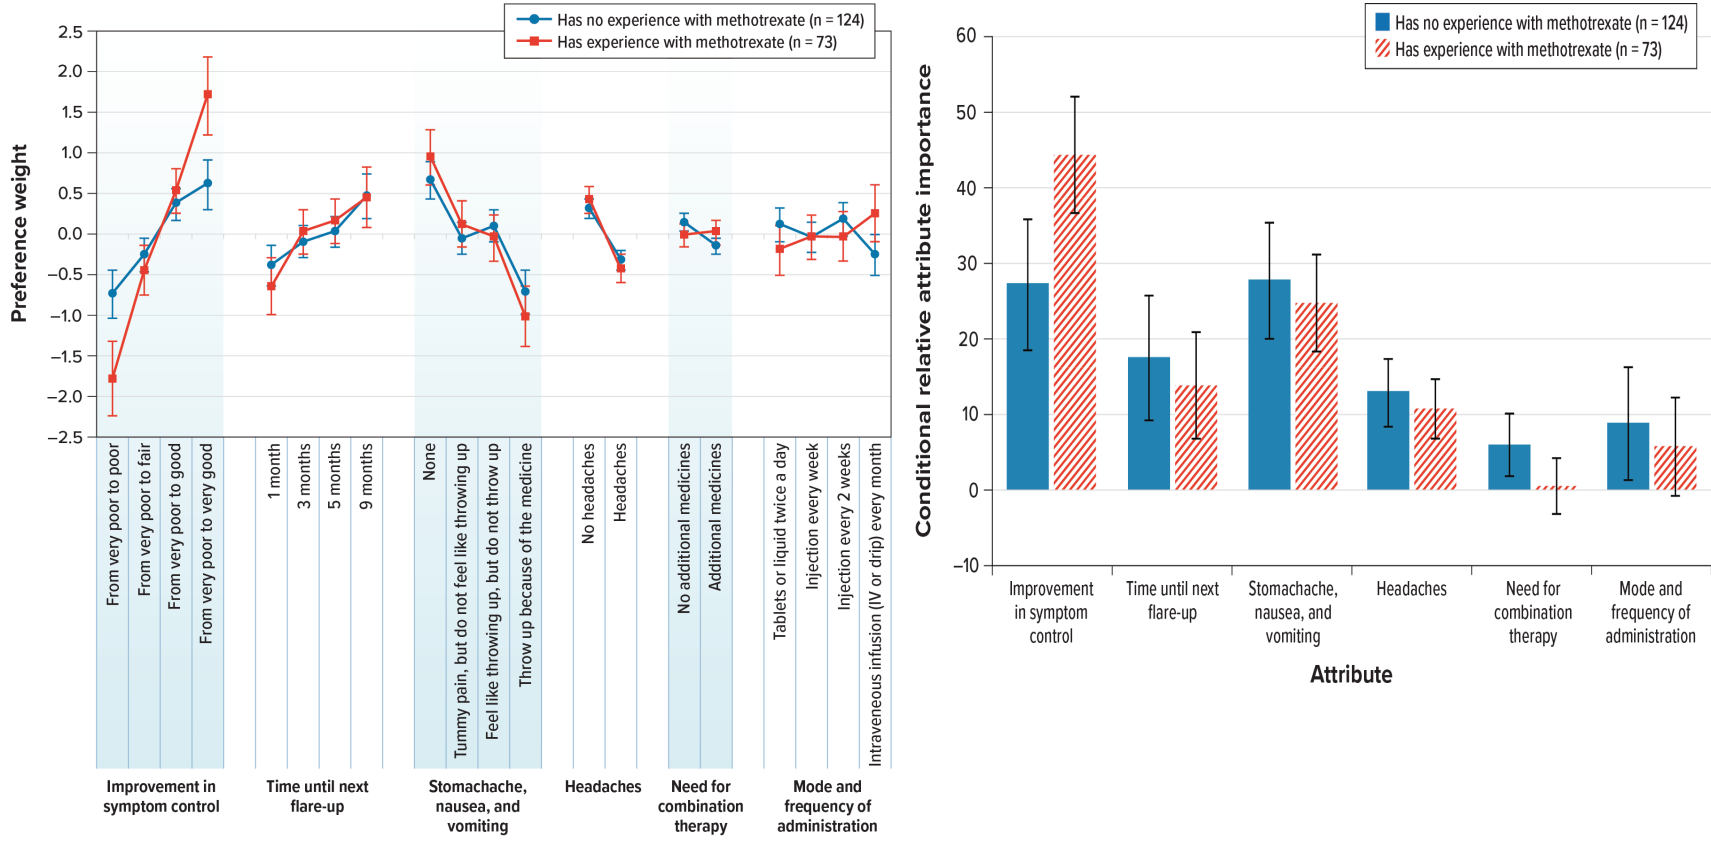

IV = intravenous.

**Figure S4. Preference Weights and Conditional Relative Importance Estimates: Adolescents With Biologics Experience Versus Adolescents With No Experience With Biologics**

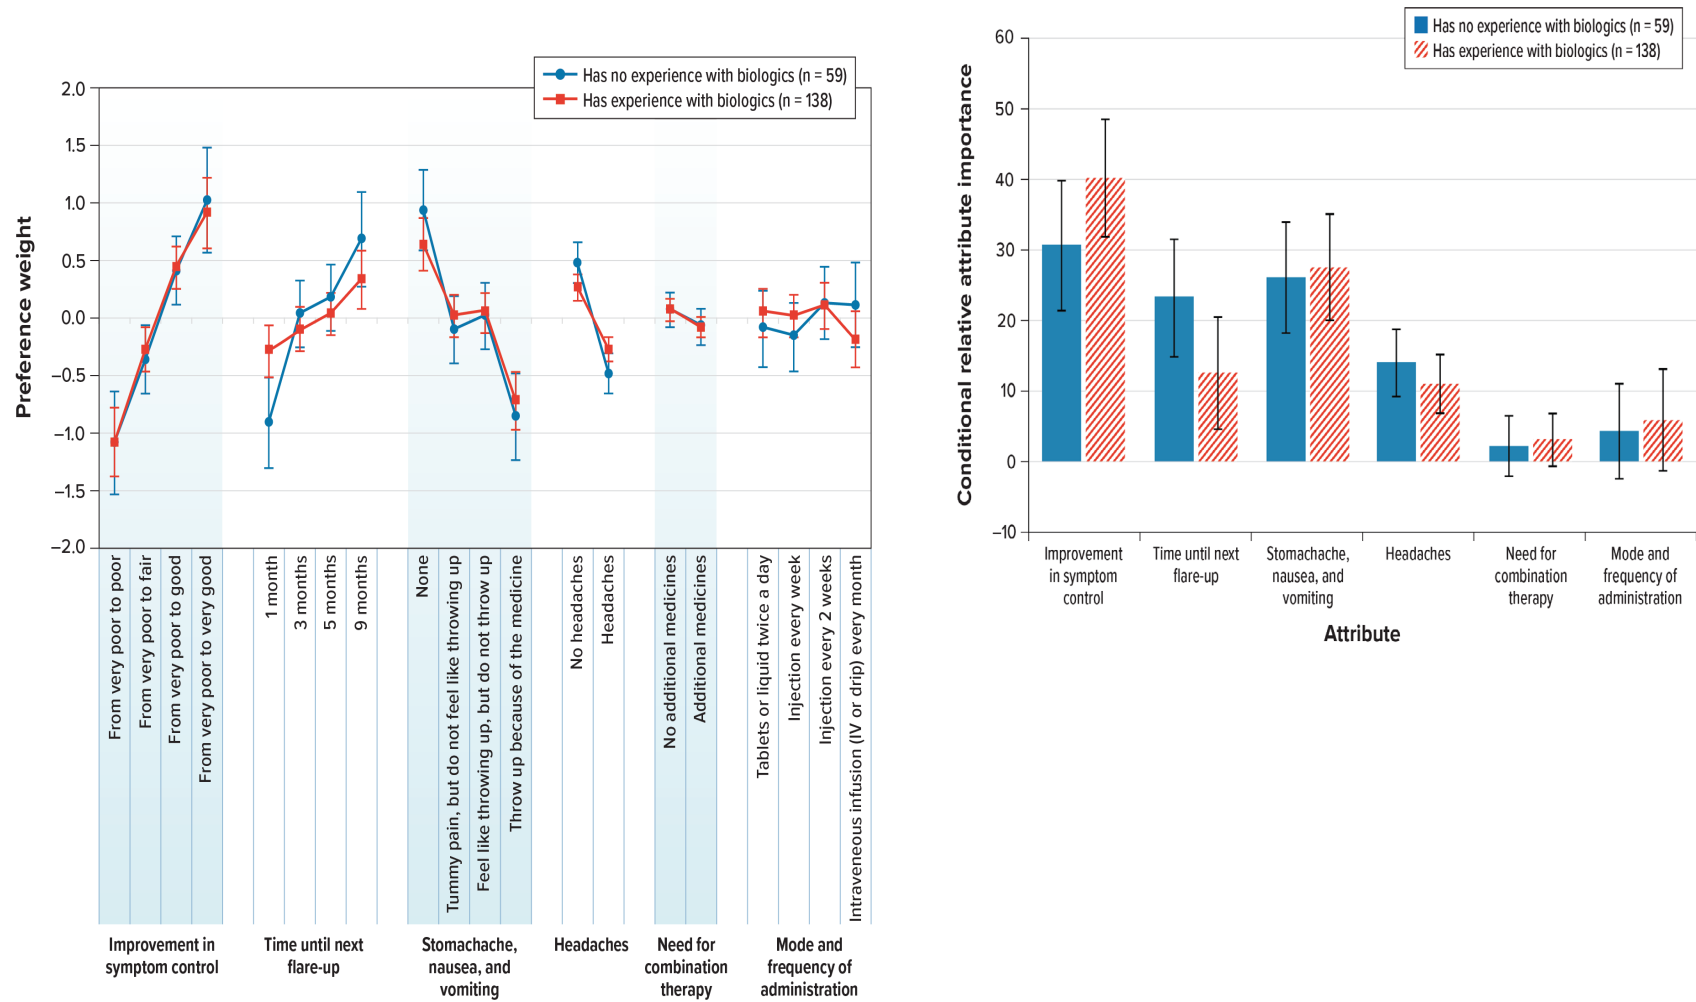

IV = intravenous.

**Figure S5. Preference Weights and Conditional Relative Importance Estimates: Adolescents With Injection Experience Versus Adolescents With No Injection Experience**

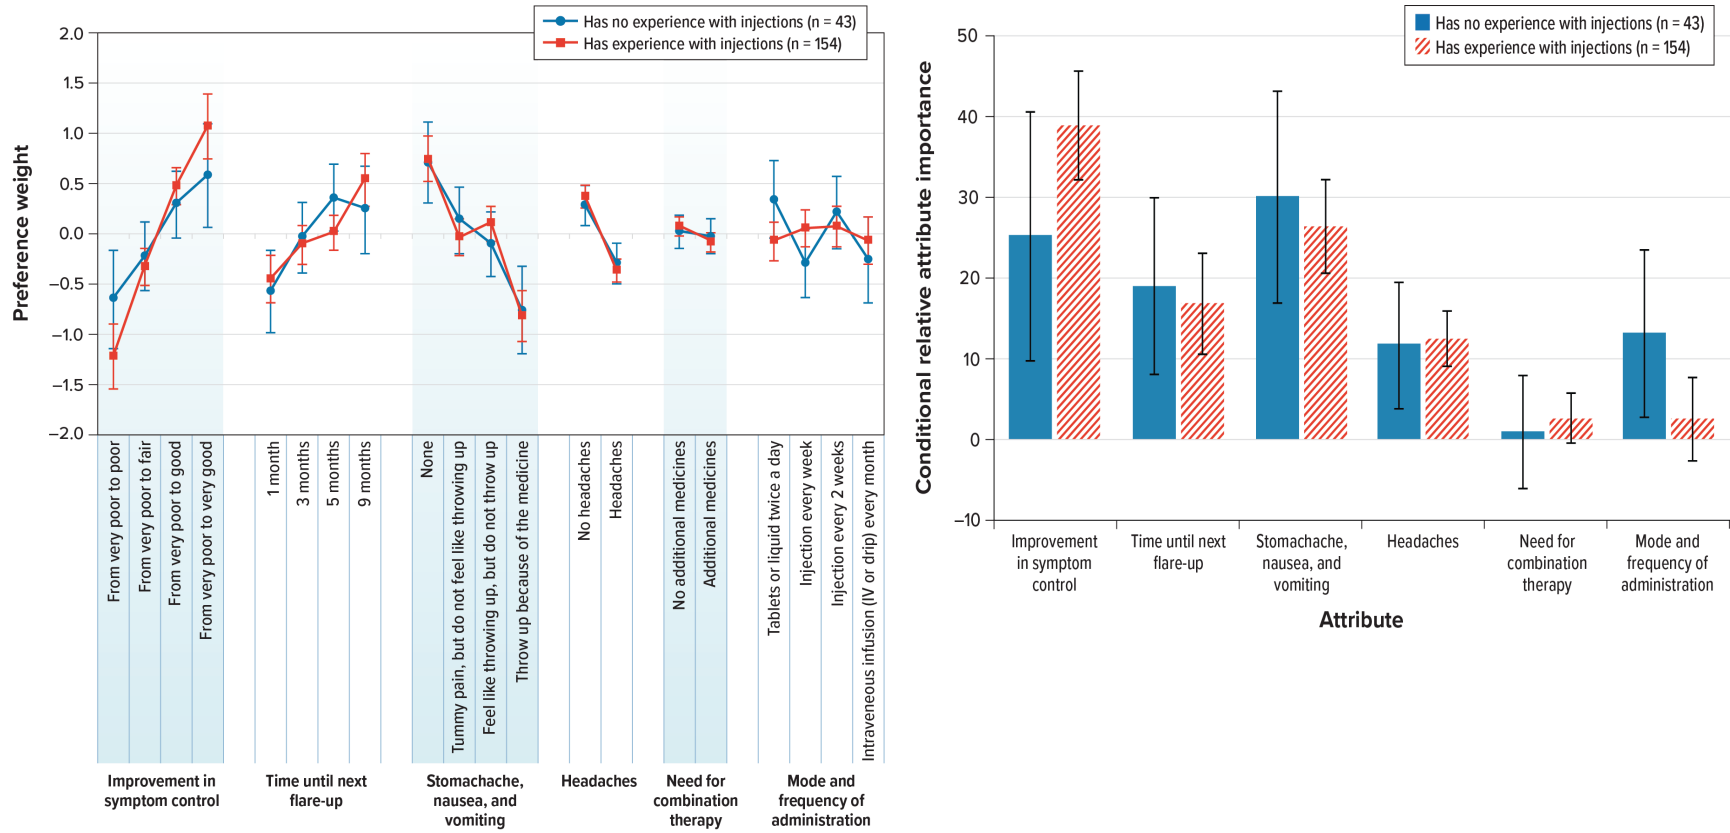

IV = intravenous.

**Figure S6. Preference Weights and Conditional Relative Importance Estimates: Adolescents Who Have Experienced Headaches as a Side Effect of Their Treatment Versus Adolescents With No Experience With Headaches as a Side Effect of Their Treatment**

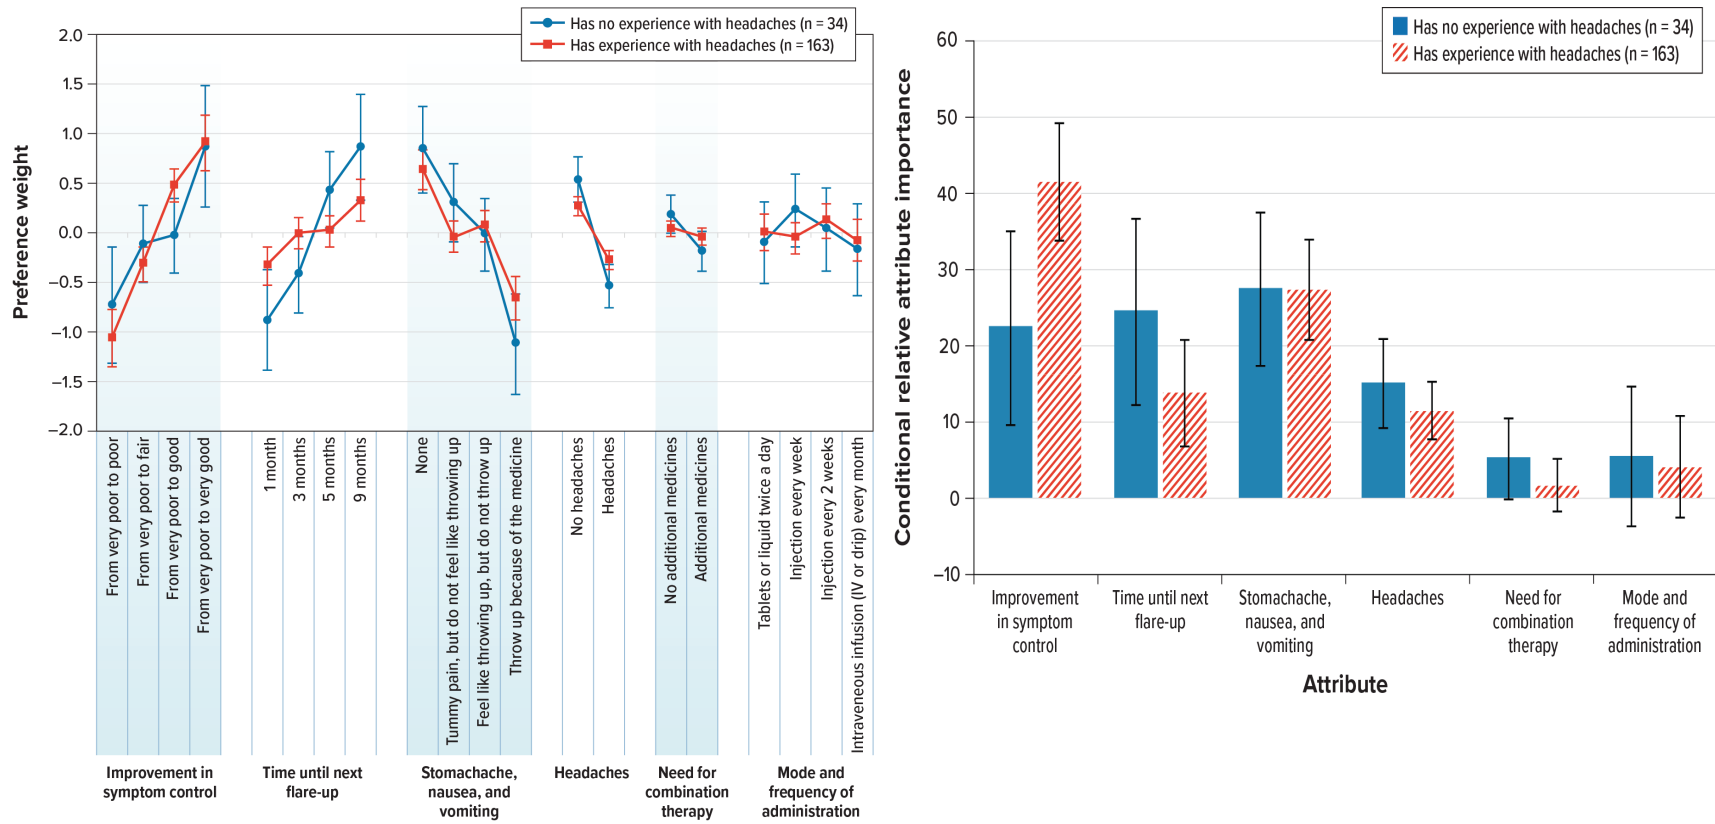

IV = intravenous.

**Figure S7. Preference Weights and Conditional Relative Importance Estimates: Adolescents Who Have Experienced Stomachaches as a Side Effect of Their Treatment Versus Adolescents With No Experience With Stomachaches as a Side Effect of Their Treatment**

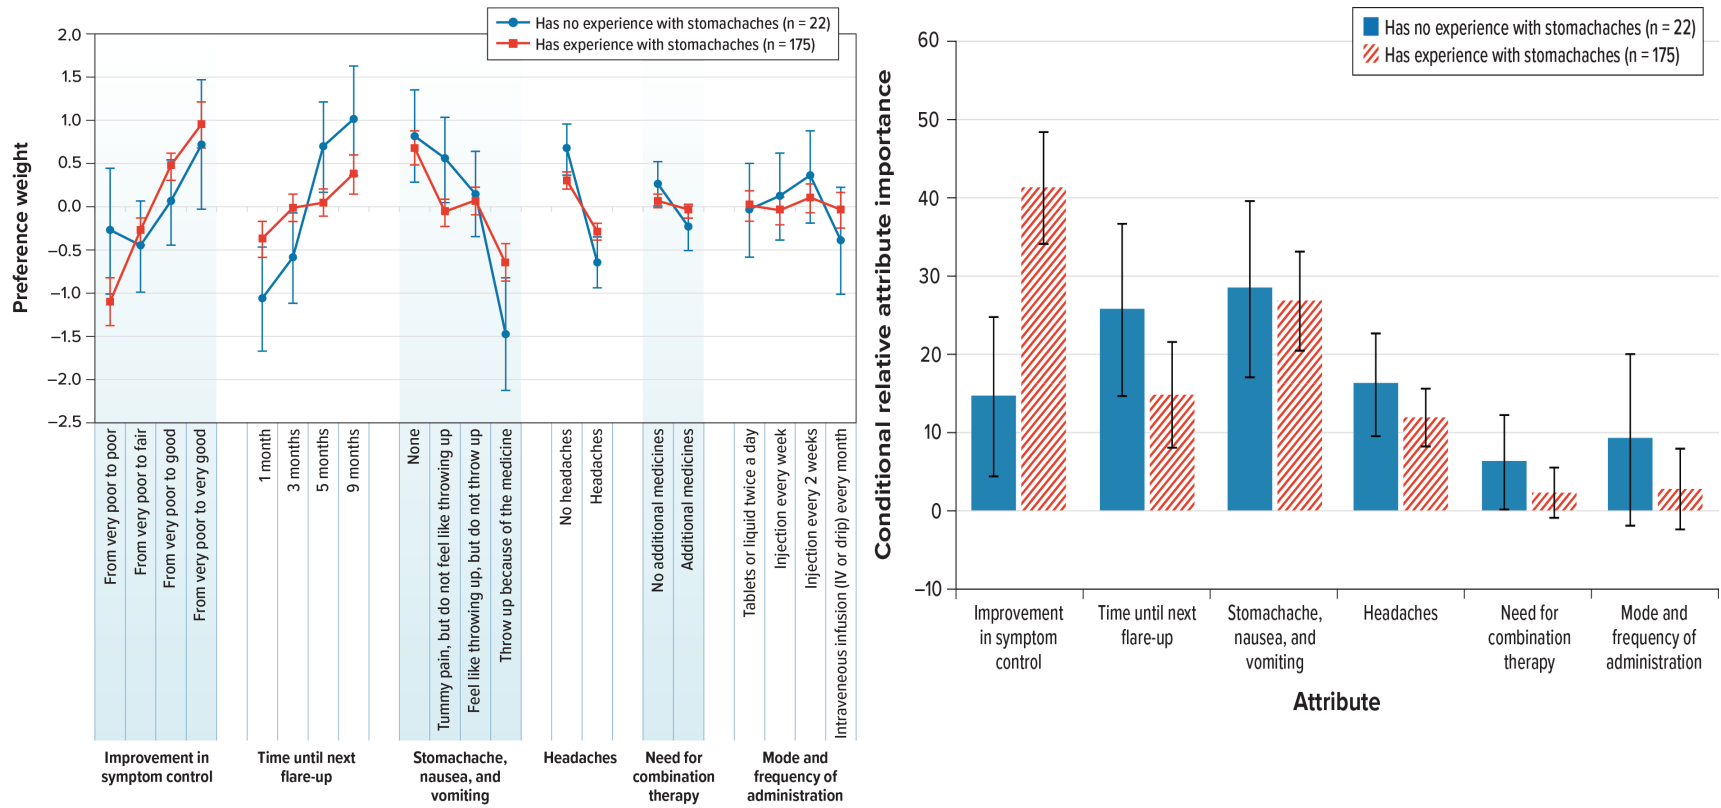

IV = intravenous.



**Figure S8. Preference Weights and Conditional Relative Importance Estimates: Adolescents Who Have Experienced Vomiting as a Side Effect of Their Treatment Versus Adolescents With No Experience With Vomiting as a Side Effect of Their Treatment**

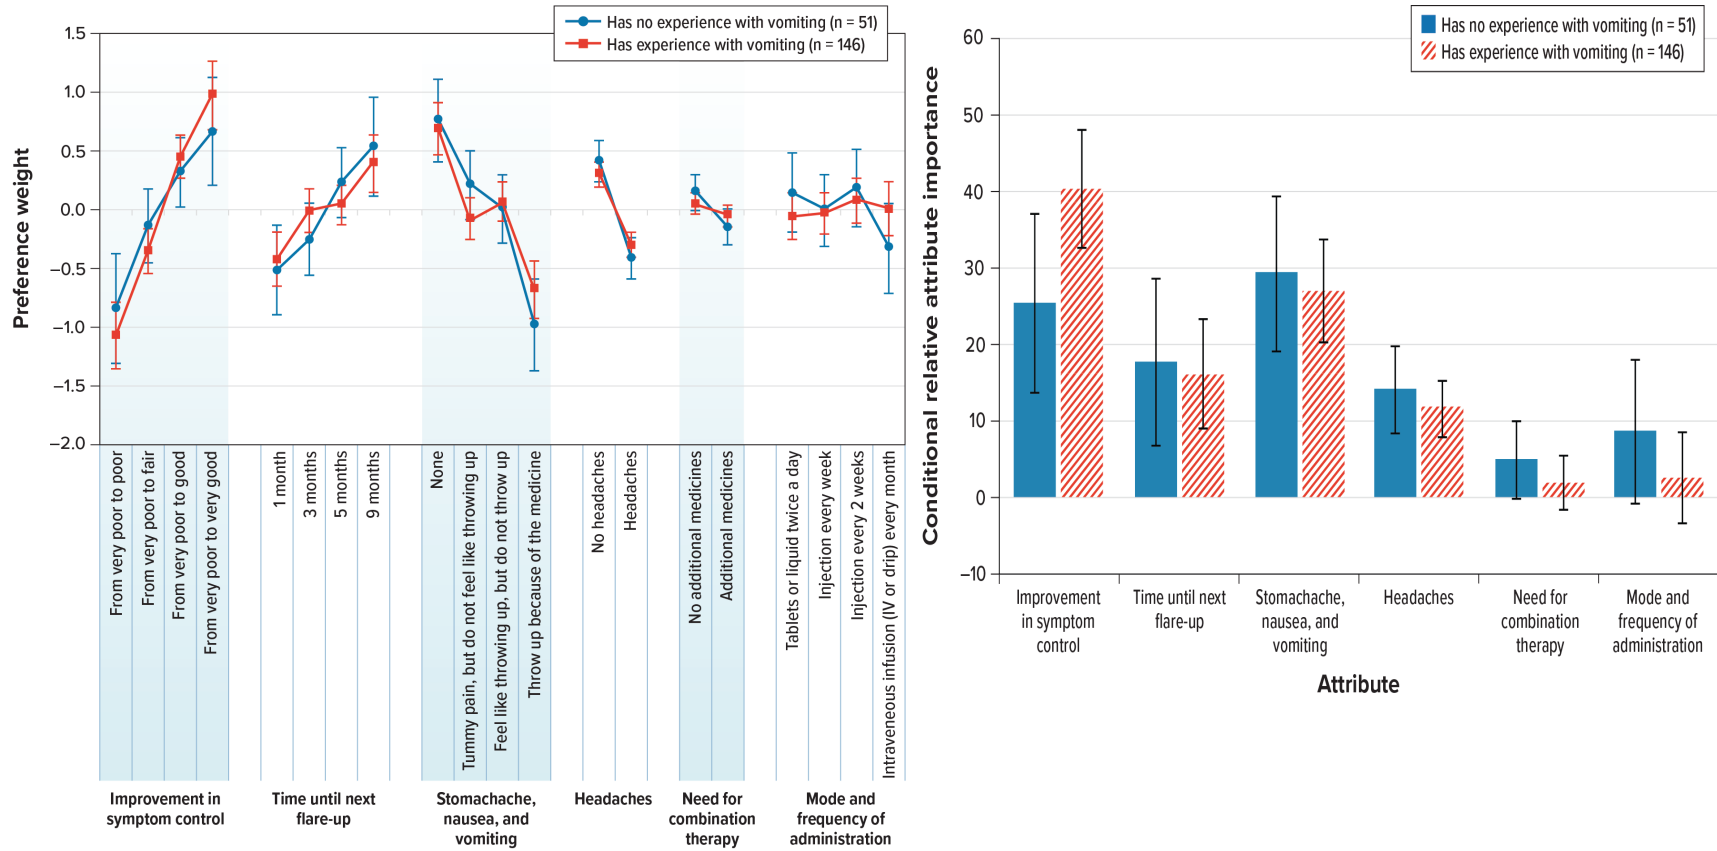

IV = intravenous.

**Figure S9 Preference Weights and Conditional Relative Importance Estimates: Caregivers With a Child Younger Than Median Age Versus Caregivers With a Child at or Older Than Median Age**

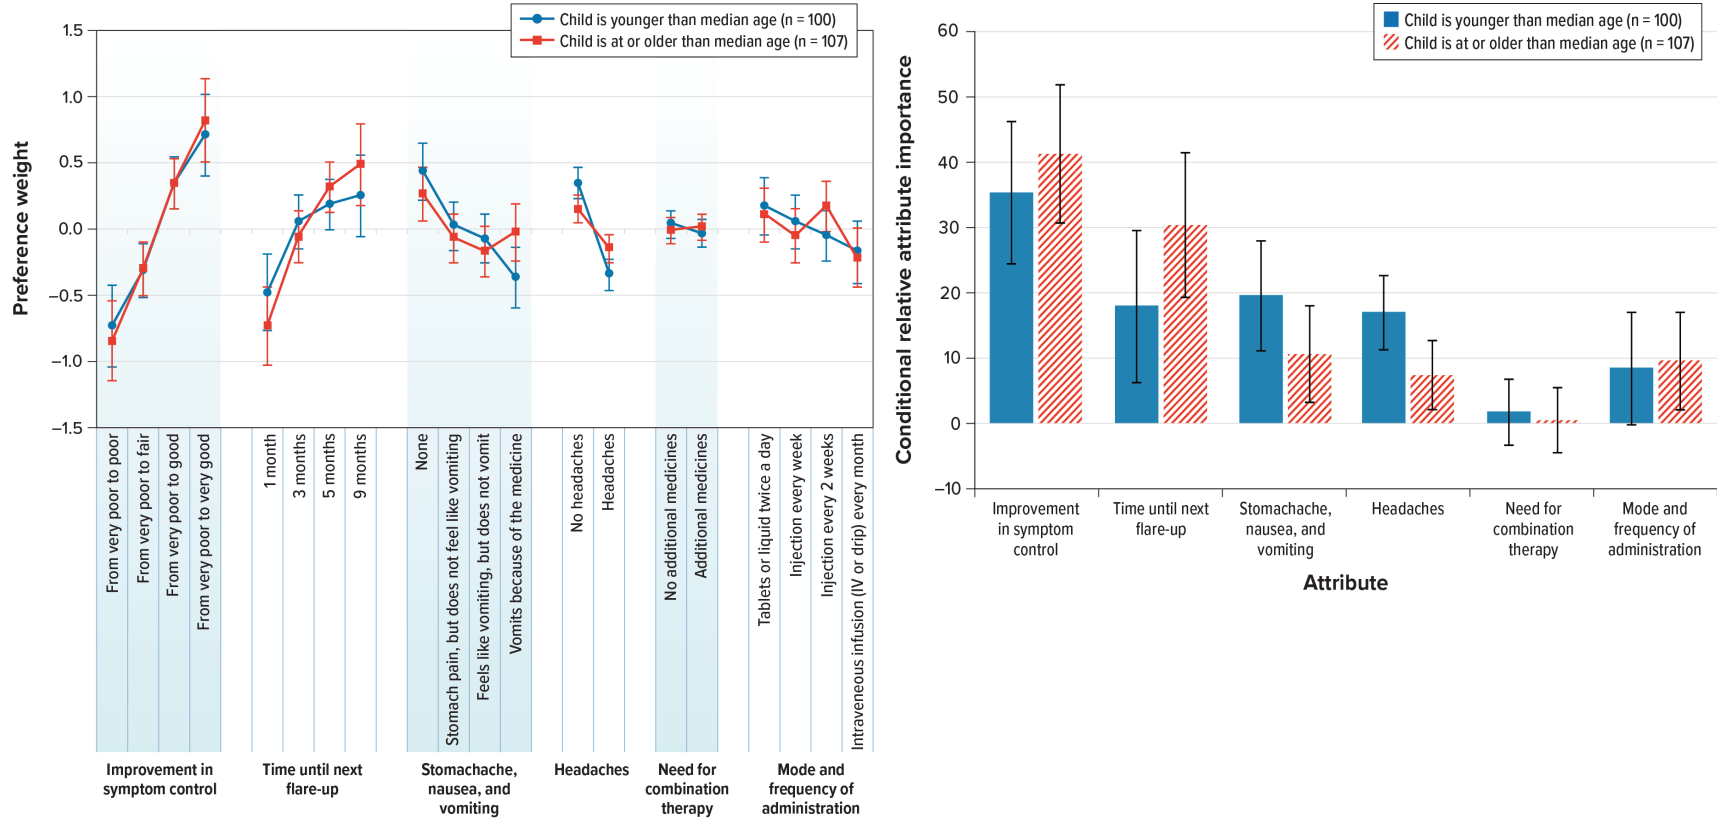

IV = intravenous.

**Figure S10. Preference Weights and Conditional Relative Importance Estimates: Caregivers With a Child Who Identifies as Female Versus Caregivers With a Child Who Does Not Identify as Female**

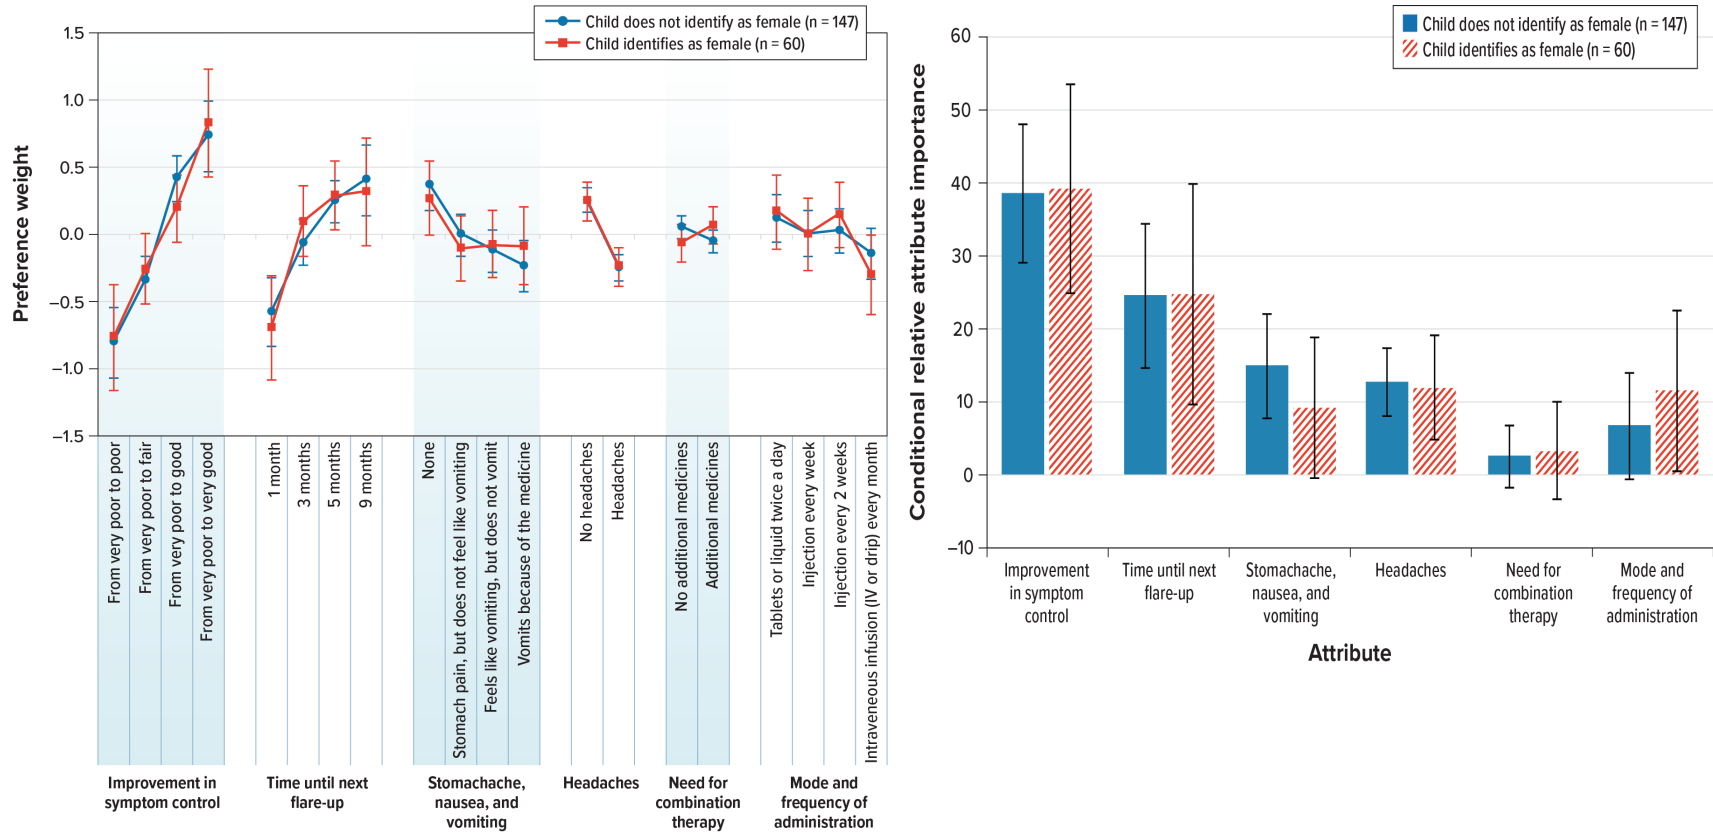

IV = intravenous.

**Figure S11. Preference Weights and Conditional Relative Importance Estimates: Caregivers With a 4-Year Degree or Higher Versus Caregivers With Less Than a 4-Year Degree**

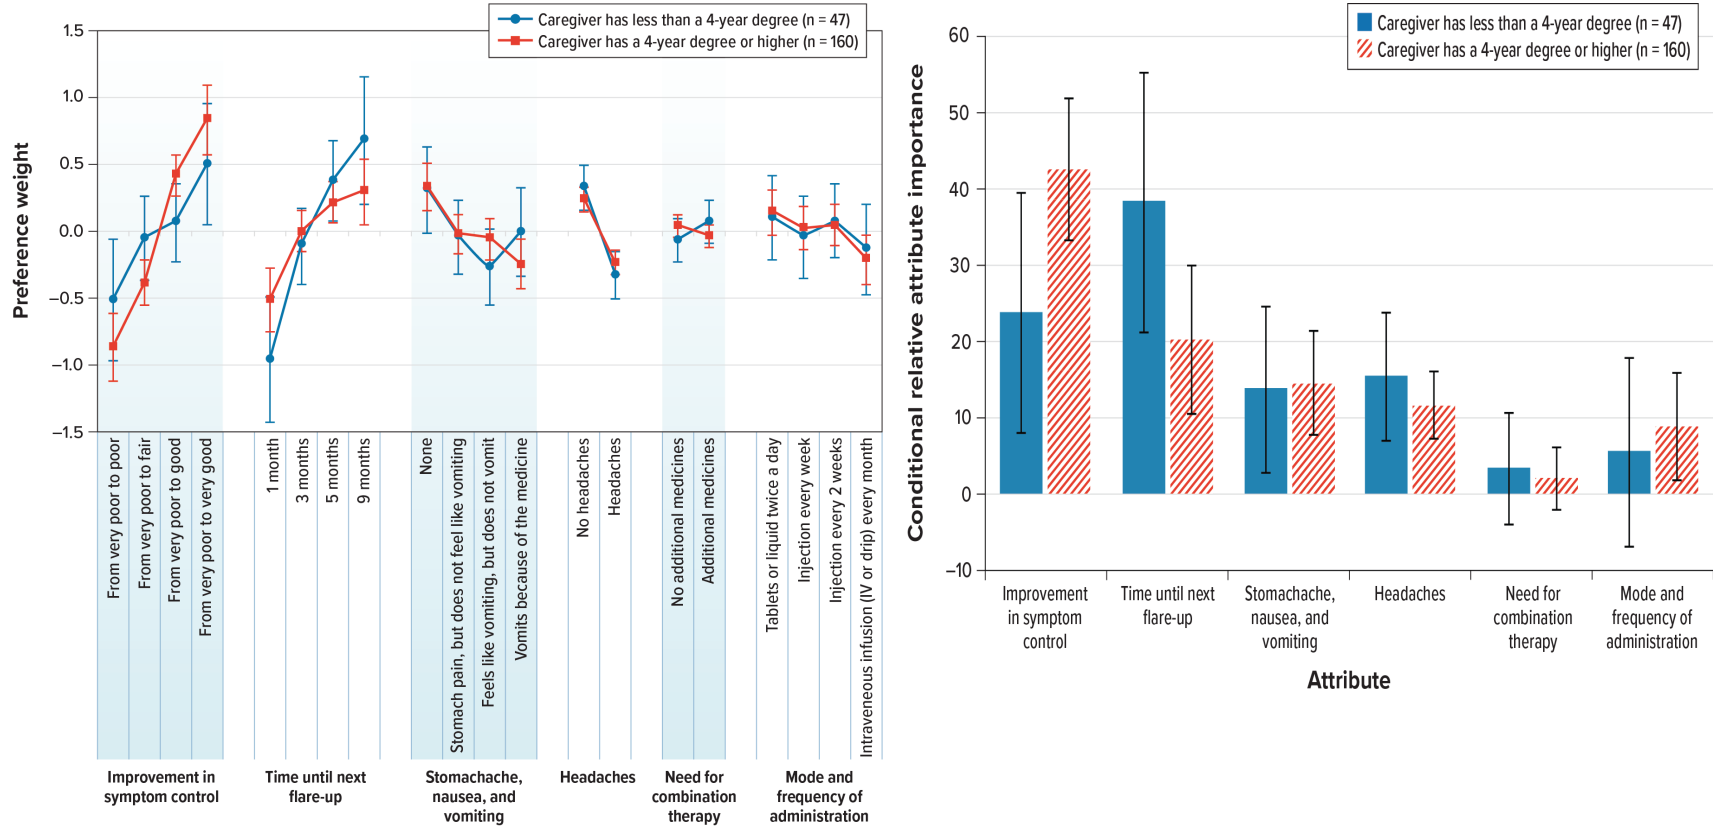

IV = intravenous.

**Figure S12. Preference Weights and Conditional Relative Importance Estimates: Caregivers With a Child Who Has Experience With Methotrexate Versus Caregivers With a Child Who Has No Experience With Methotrexate**

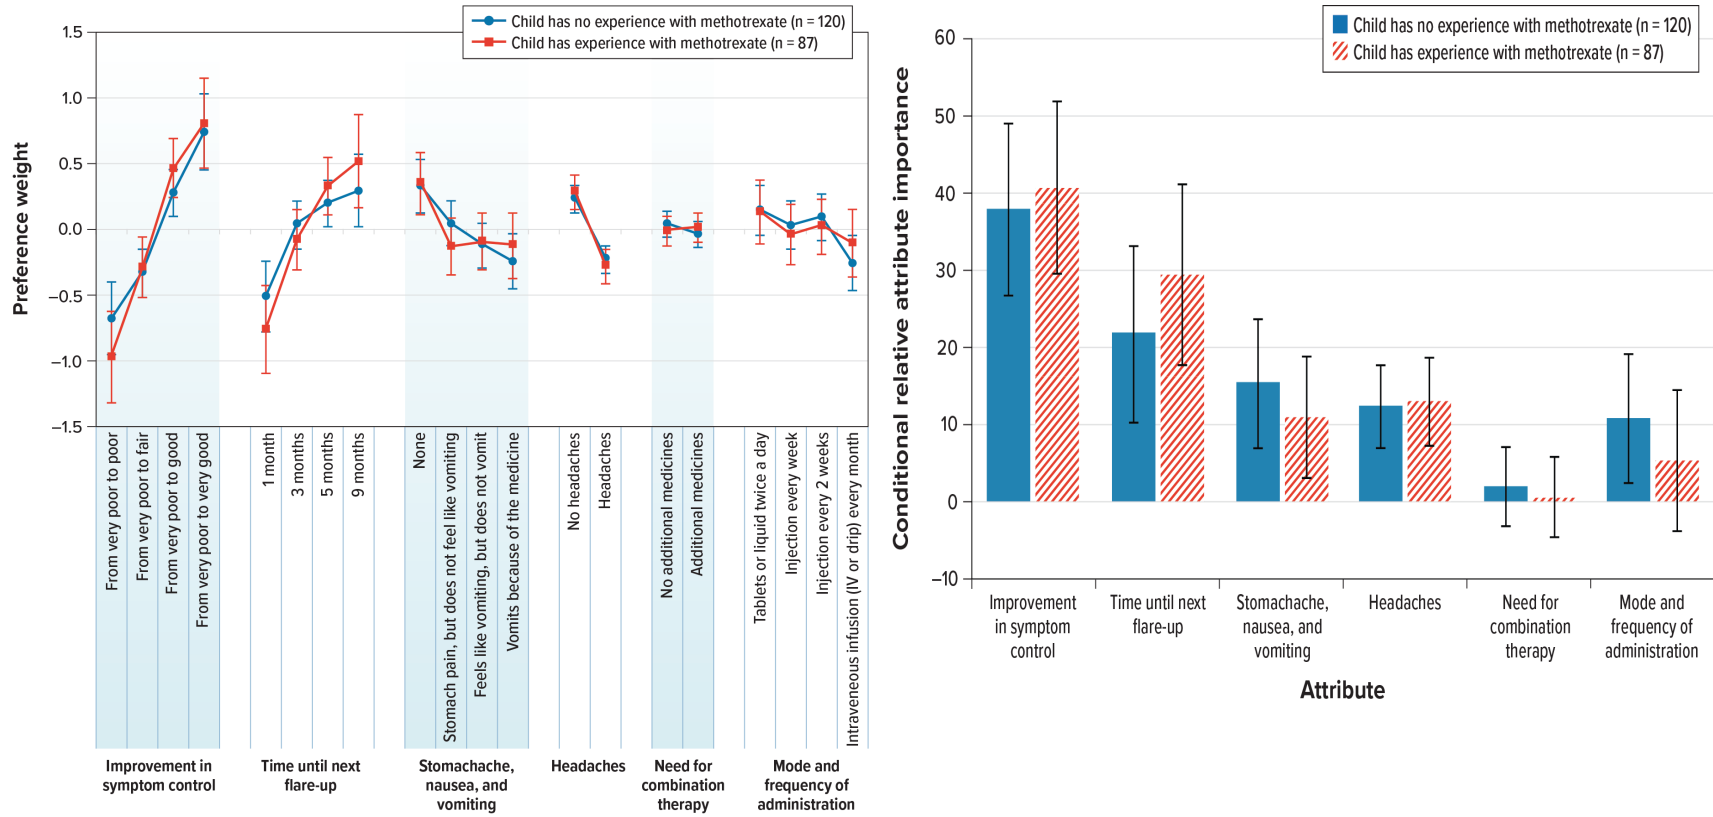

IV = intravenous.

**Figure S13. Preference Weights and Conditional Relative Importance Estimates: Caregivers With a Child Who Has Experience With Biologics Versus Caregivers With a Child Who Has No Experience With Biologics**

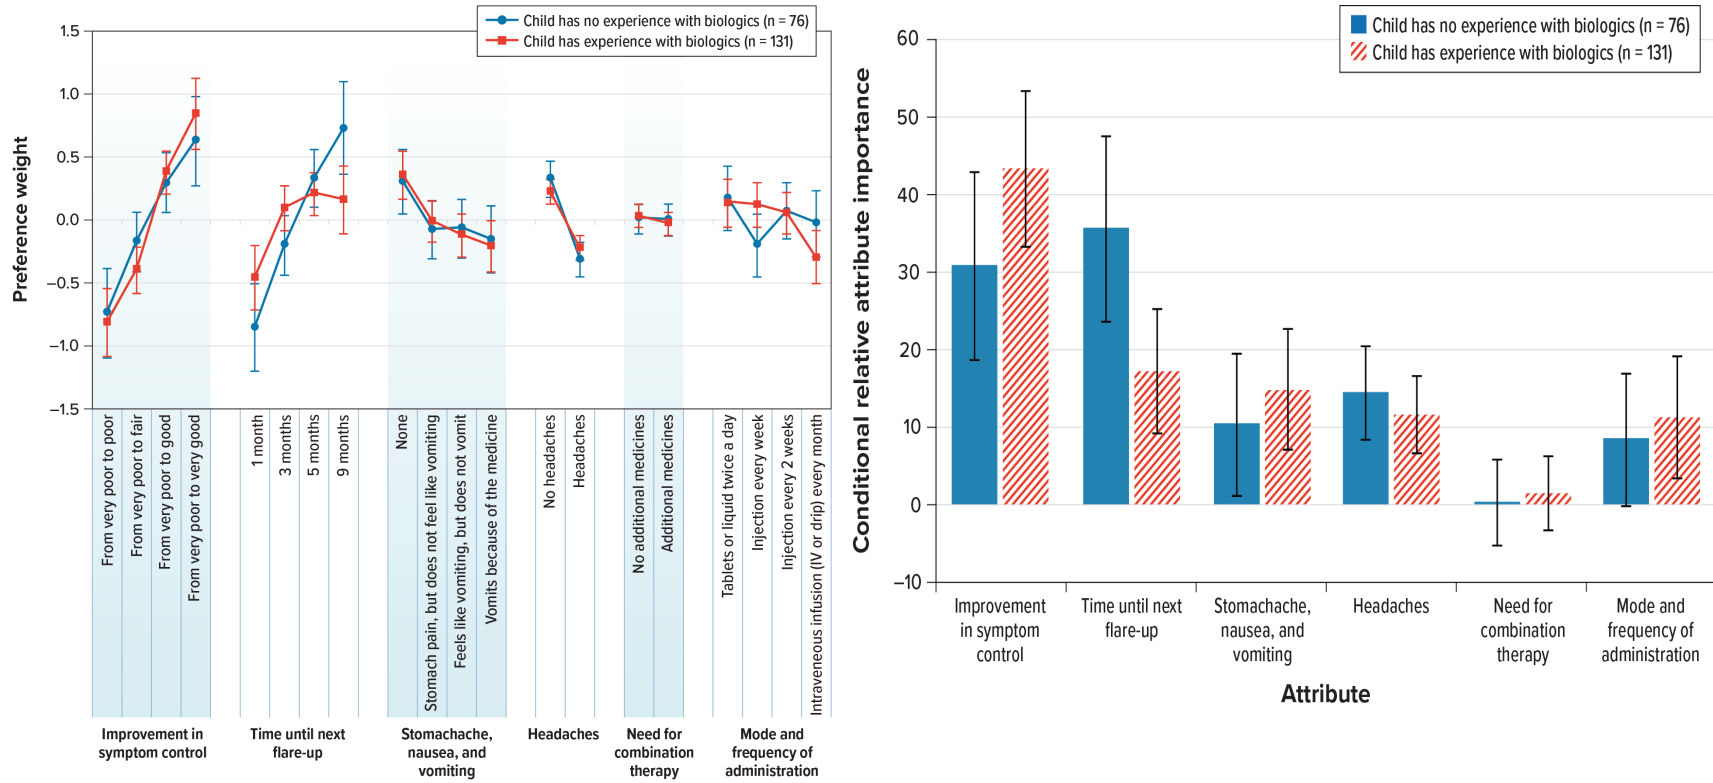

IV = intravenous.

**Figure S14. Preference Weights and Conditional Relative Importance Estimates: Caregivers With a Child Who Has Experience With Injections Versus Caregivers With a Child Who Has No Experience With Injections**

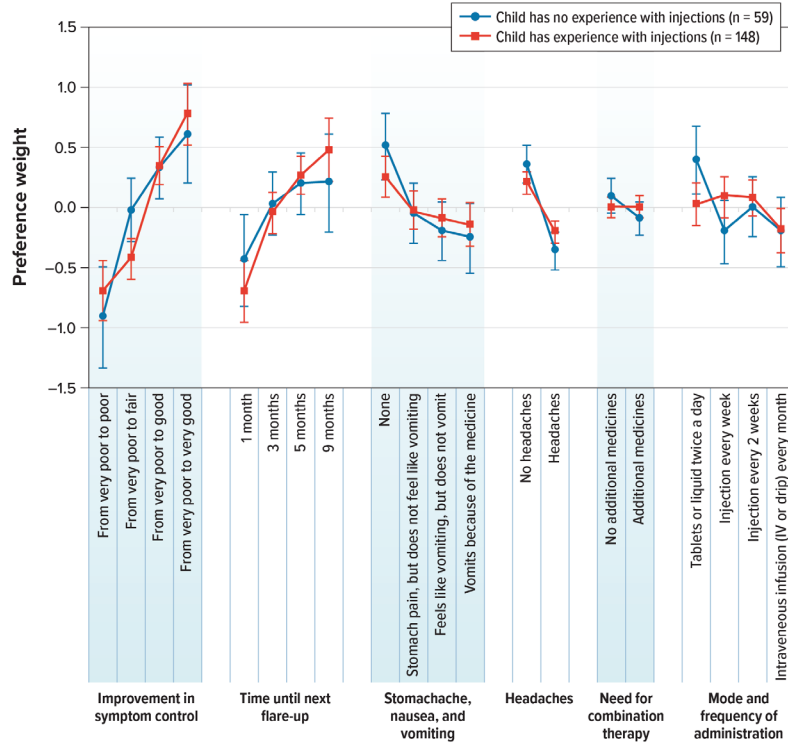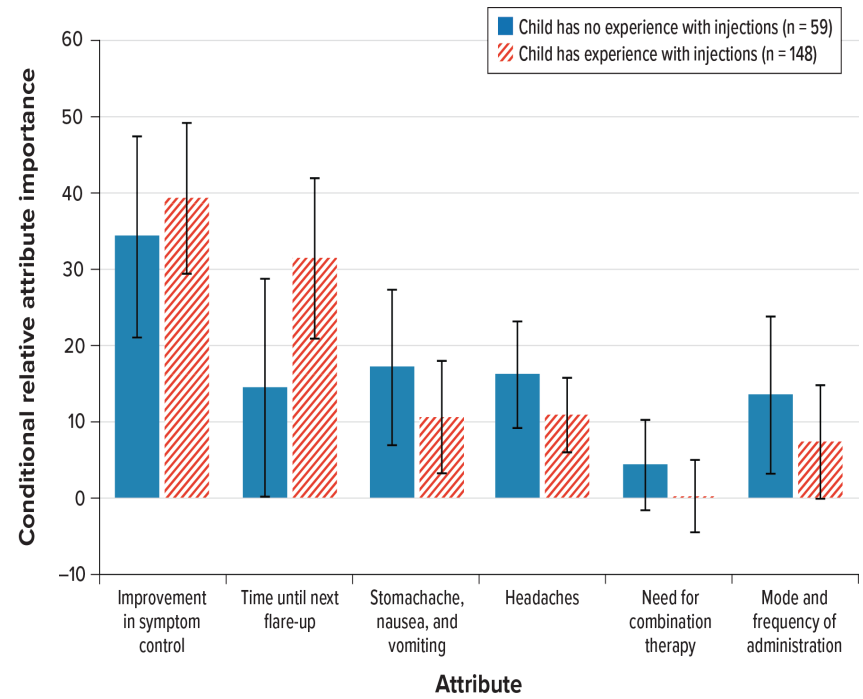

IV = intravenous.

**Figure S15. Preference Weights and Conditional Relative Importance Estimates: Caregivers With a Child Who Has Experience With Headaches as a Side Effect of Their Treatment Versus Caregivers With a Child Who Has No Experience With Headaches as a Side Effect of Their Treatment**

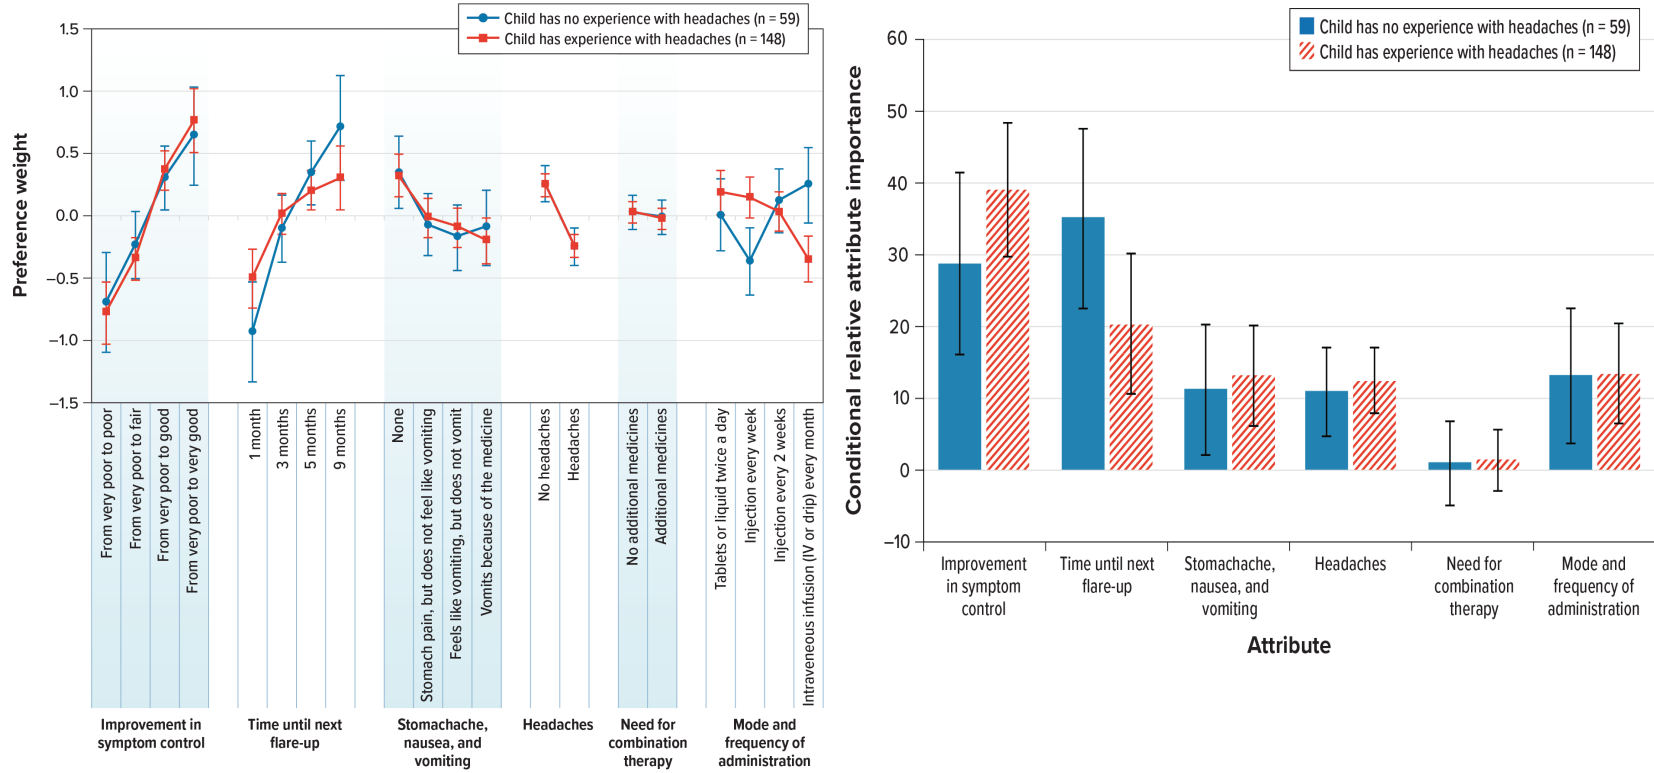

IV = intravenous.



**Figure S16. Preference Weights and Conditional Relative Importance Estimates: Caregivers With a Child Who Has Experience With Stomachaches as a Side Effect of Their Treatment Versus Caregivers With a Child Who Has No Experience With Stomachaches as a Side Effect of Their Treatment**

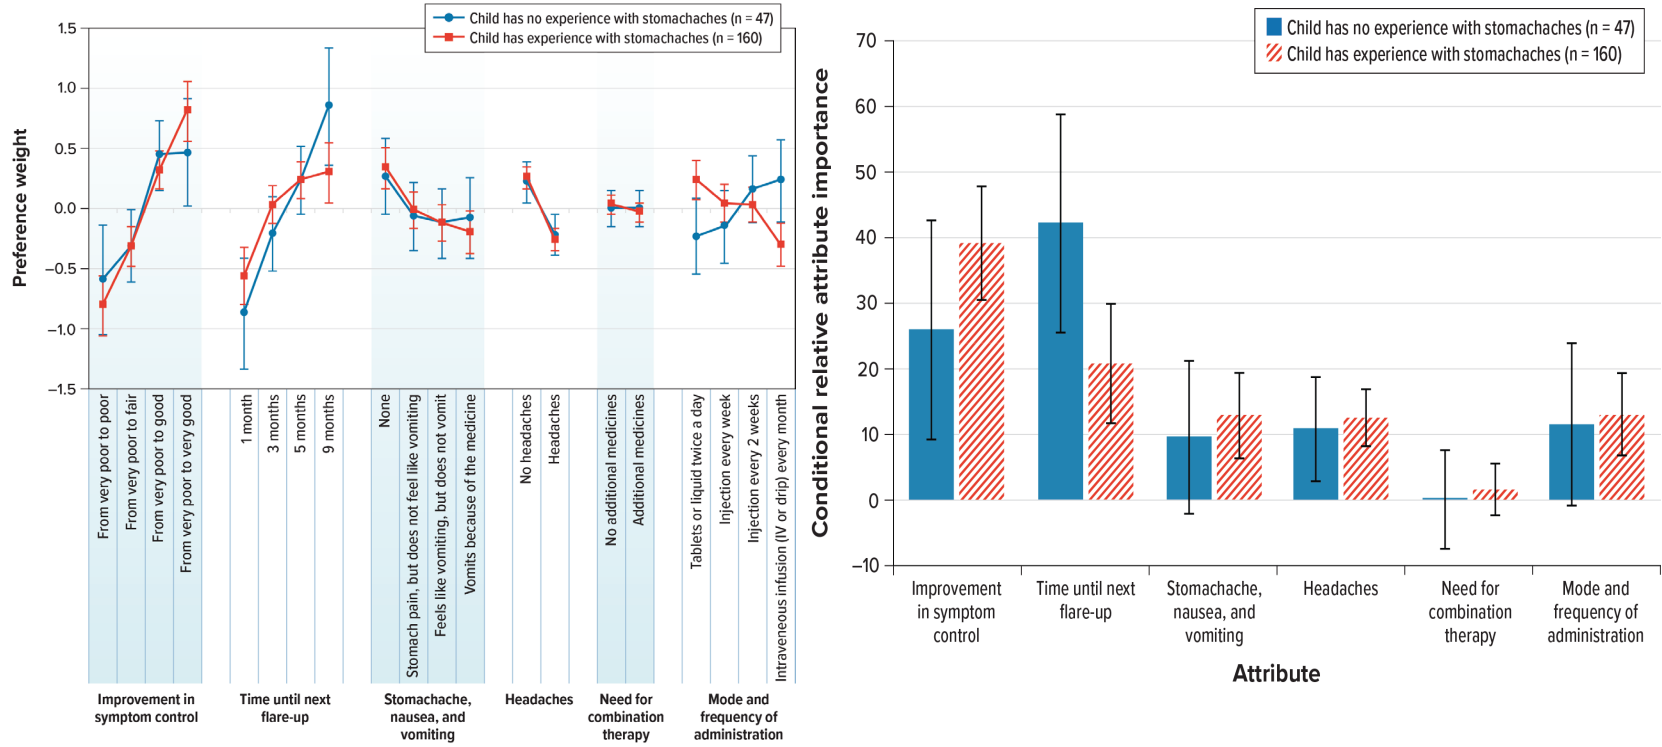

IV = intravenous.

**Figure S17. Preference Weights and Conditional Relative Importance Estimates: Caregivers With a Child Who Has Experience With Vomiting as a Side Effect of Their Treatment Versus Caregivers With a Child Who Has No Experience With Vomiting as a Side Effect of Their Treatment**

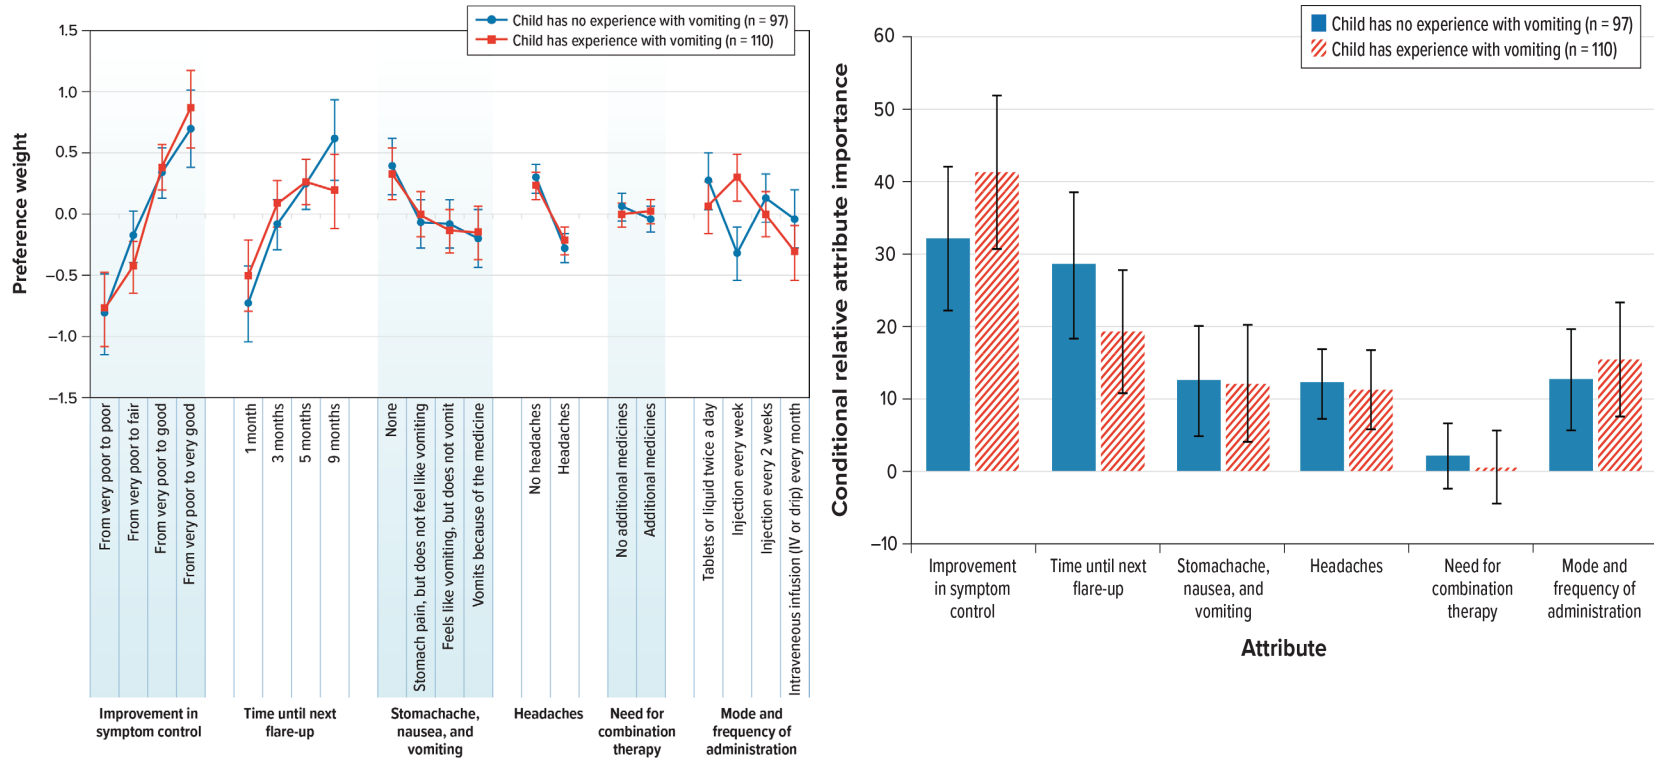

IV = intravenous.

## Appendix B: Subgroup Analyses, UK Sample

**Figure S18. Preference Weights and Conditional Relative Importance Estimates: Adolescents Younger Than Median Age Versus Adolescents at or Older Than Median Age**

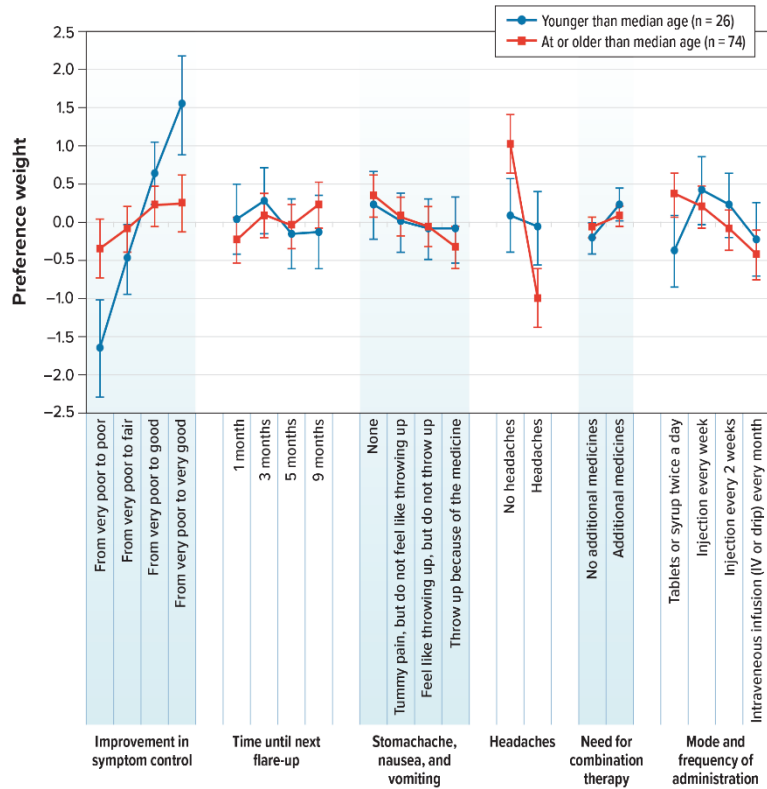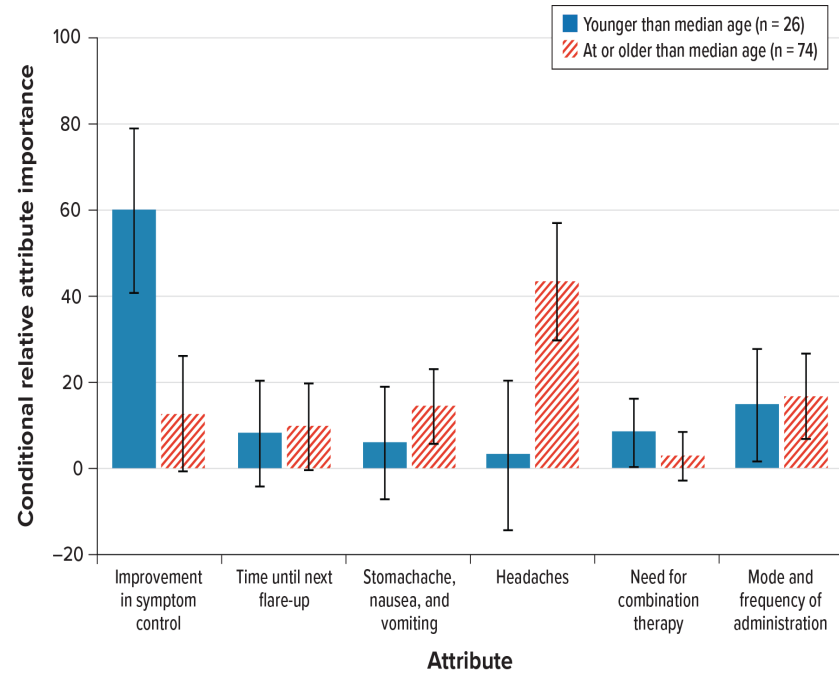

IV = intravenous.

**Figure S19. Preference Weights and Conditional Relative Importance Estimates: Adolescents Who Identify as Female Versus Adolescents Who Do Not Identify as Female**

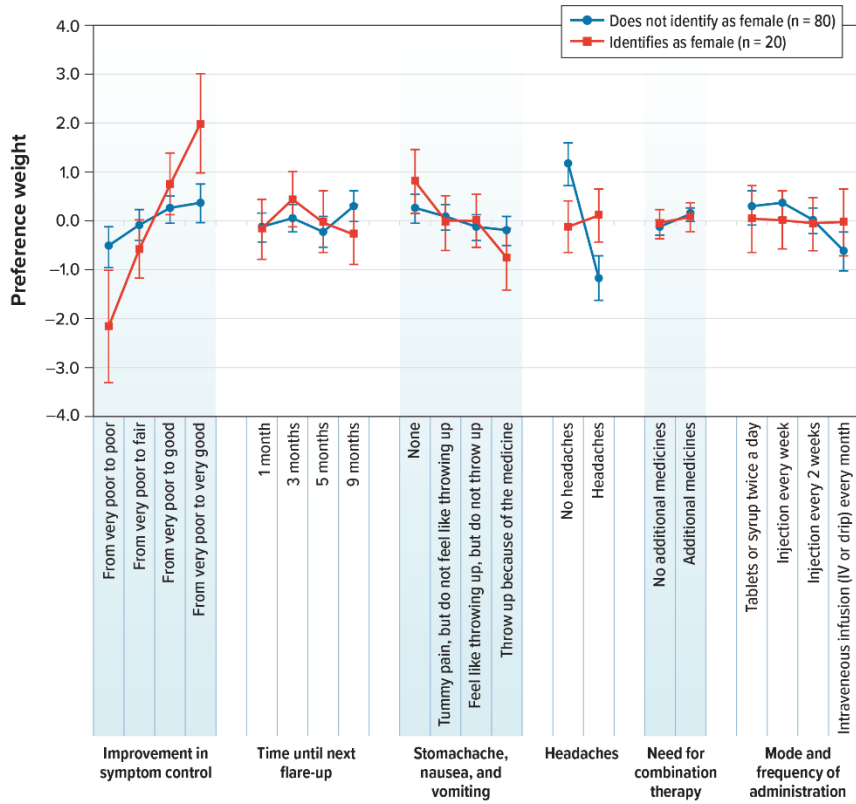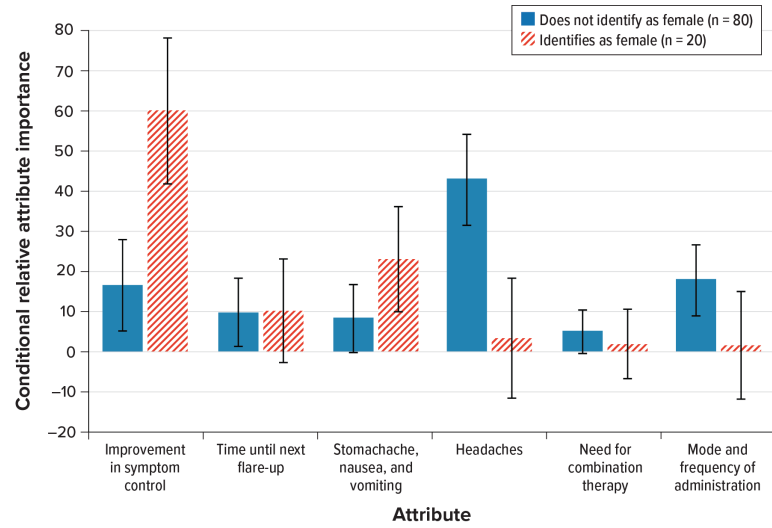

IV = intravenous.

**Figure S20. Preference Weights and Conditional Relative Importance Estimates: Adolescents With Methotrexate Experience Versus Adolescents With No Experience With Methotrexate**

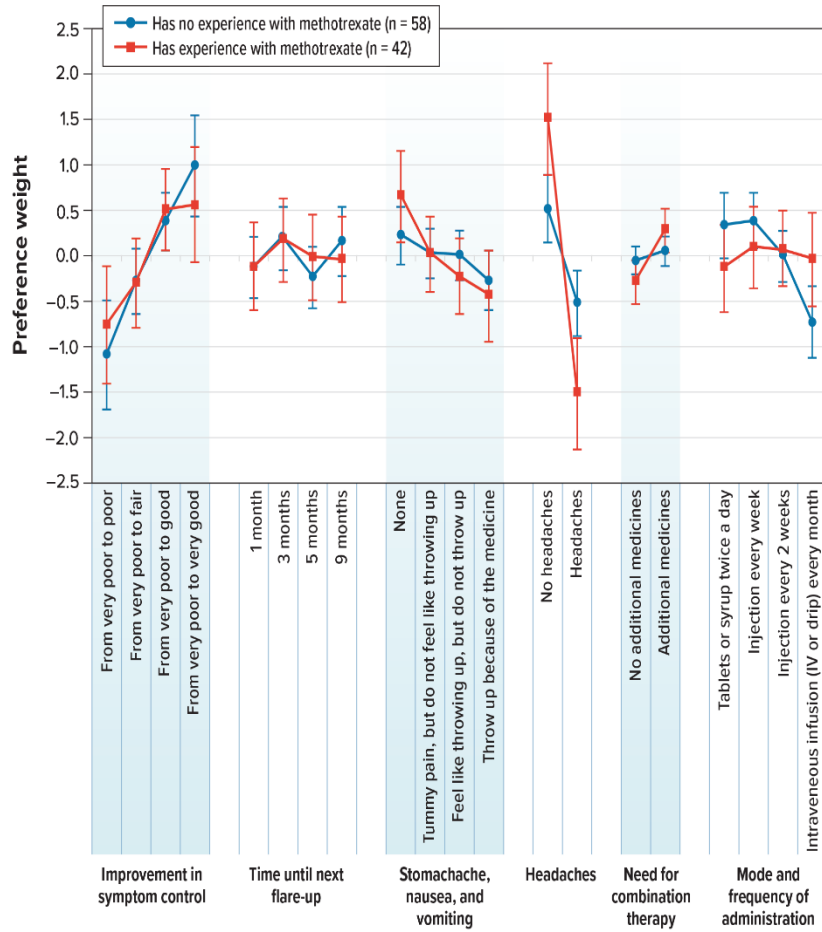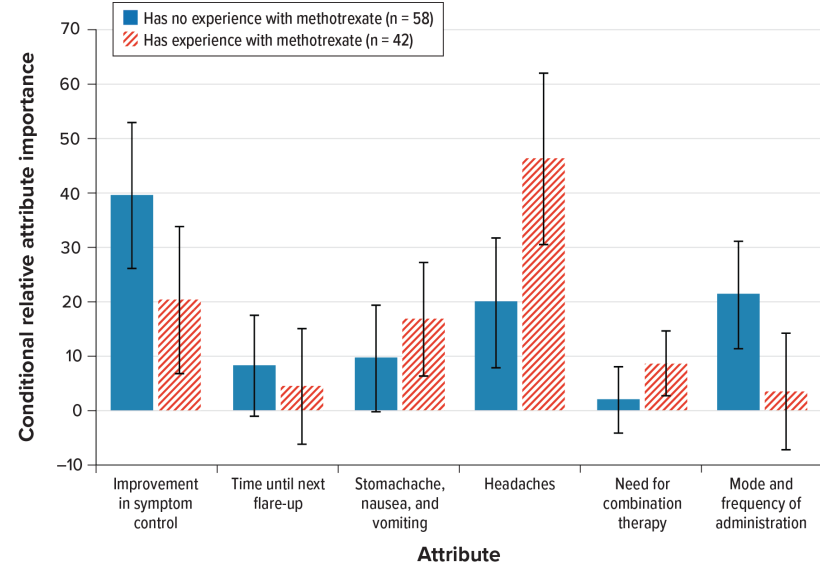

IV = intravenous.

**Figure S21. Preference Weights and Conditional Relative Importance Estimates: Adolescents With Biologics Experience Versus Adolescents With No Experience With Biologics**

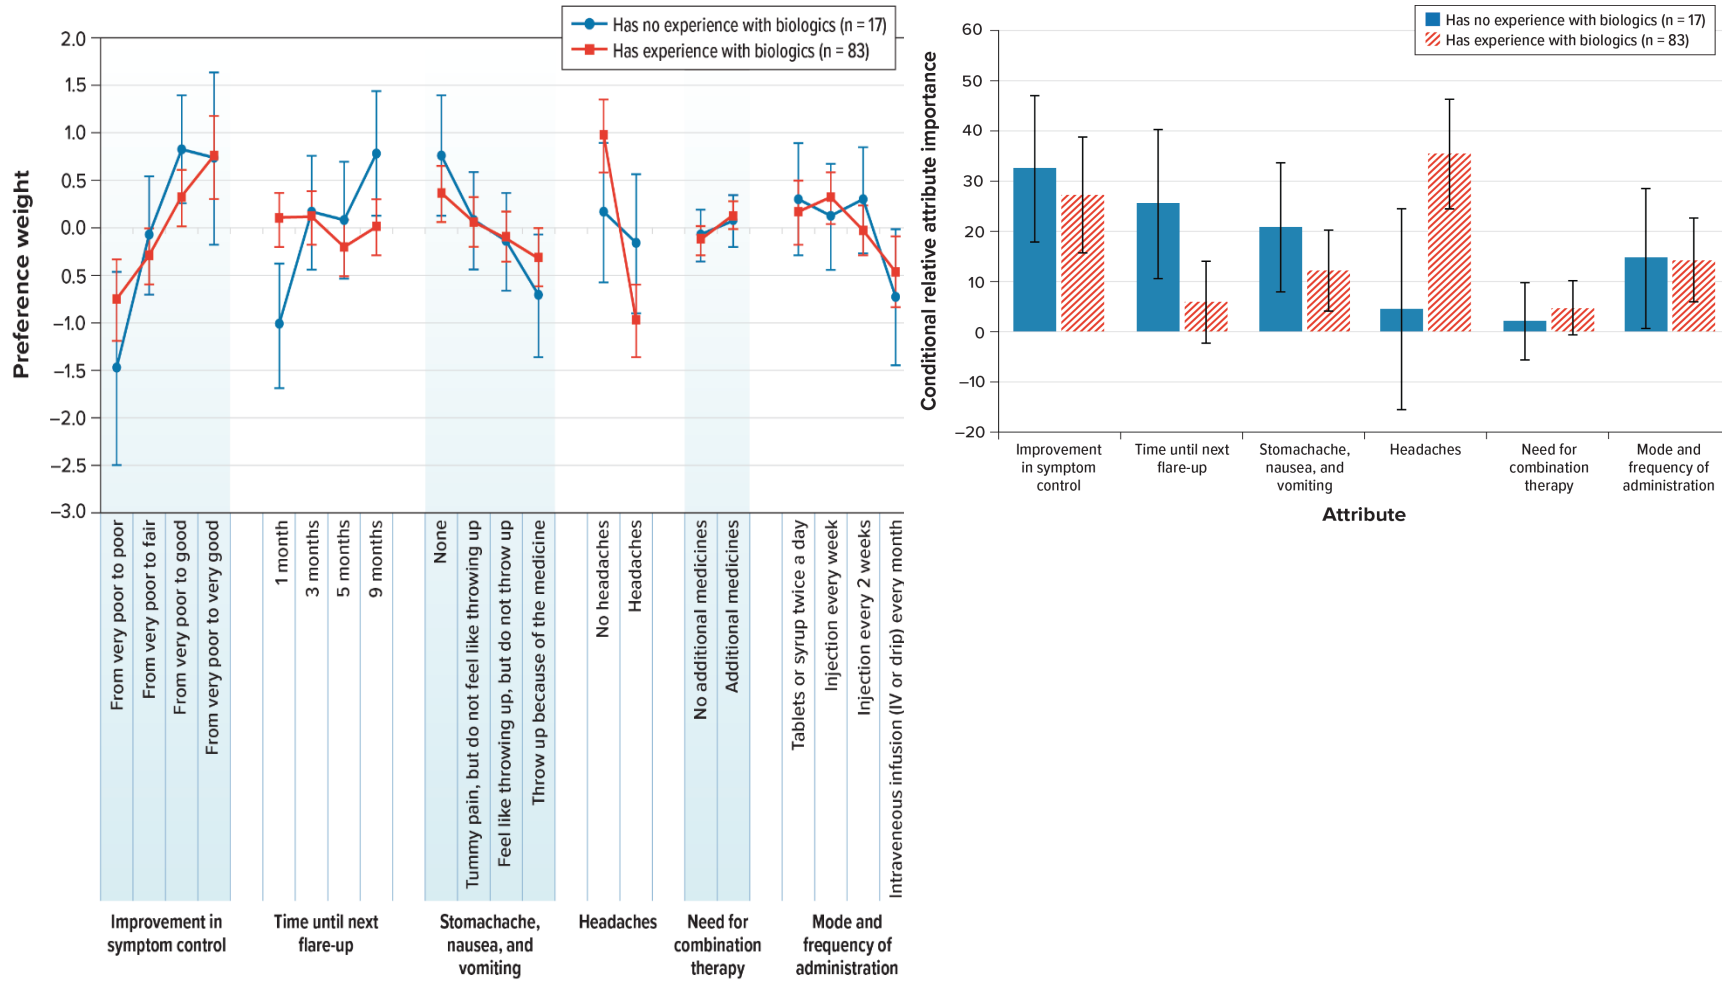

IV = intravenous.

**Figure S22. Preference Weights and Conditional Relative Importance Estimates: Adolescents With Injection Experience Versus Adolescents With No Injection Experience**

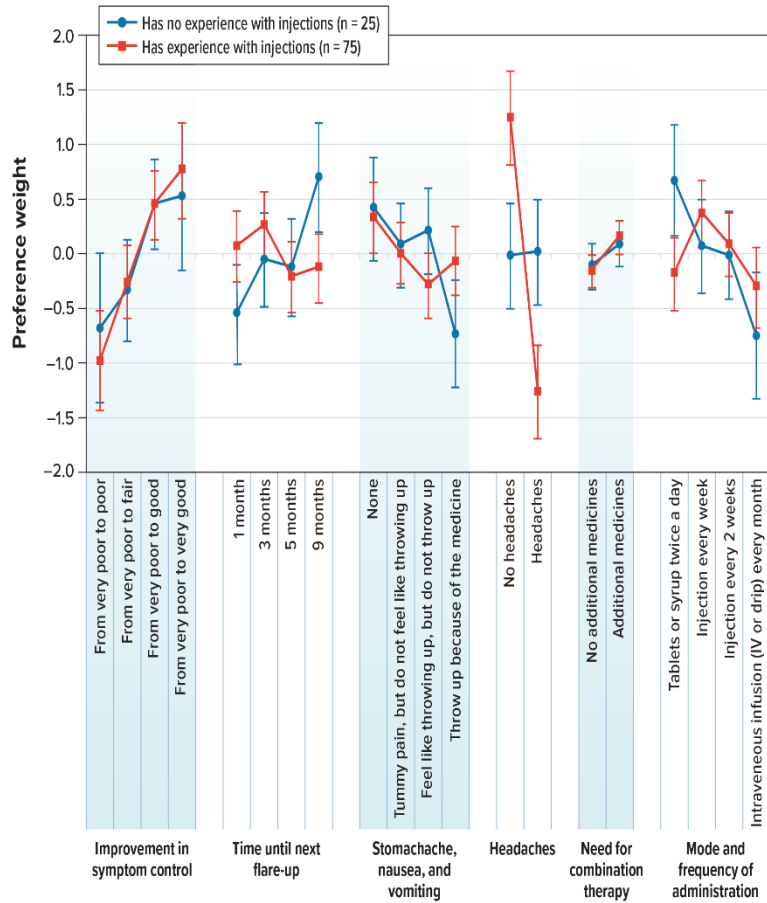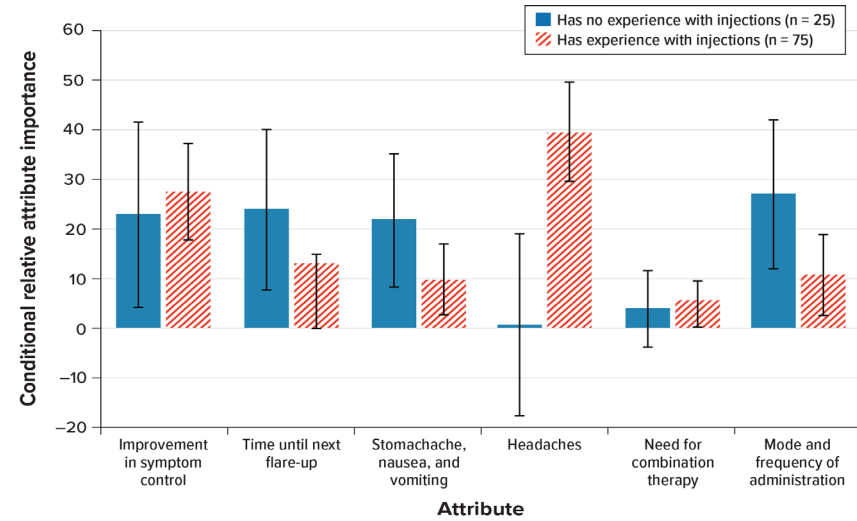

IV = intravenous.

**Figure S23. Preference Weights and Conditional Relative Importance Estimates: Adolescents Who Have Experienced Headaches as a Side Effect of Their Treatment Versus Adolescents With No Experience With Headaches as a Side Effect of Their Treatment**

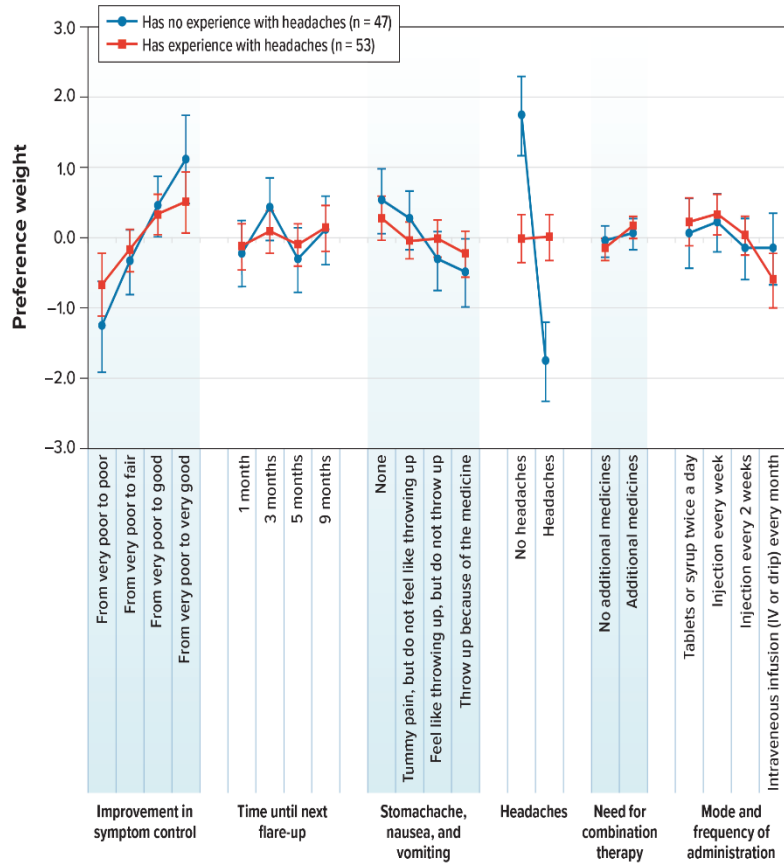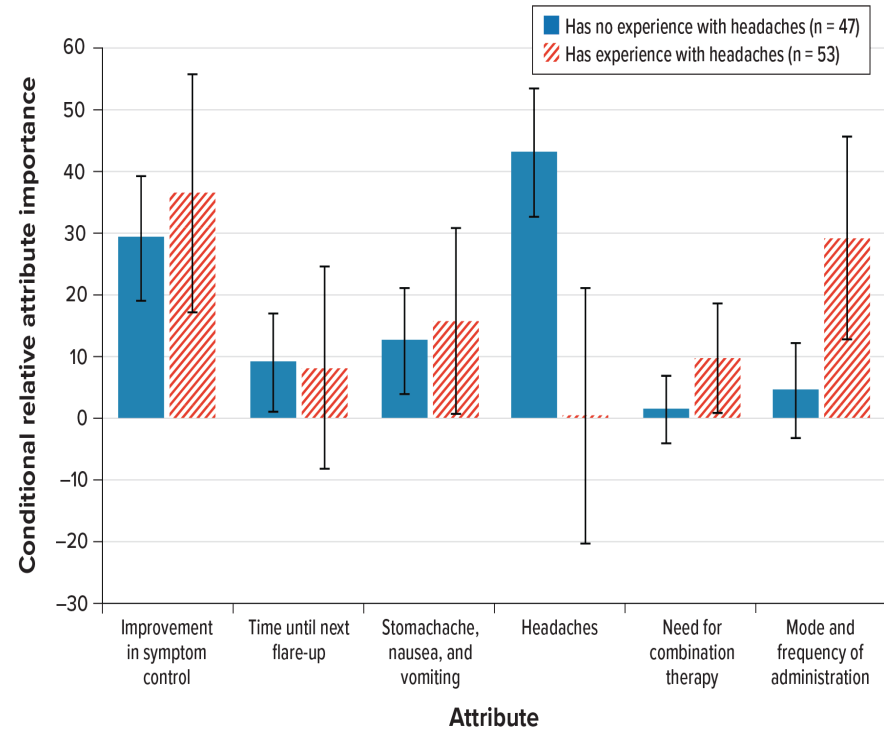

IV = intravenous.



**Figure S24. Preference Weights and Conditional Relative Importance Estimates: Adolescents Who Have Experienced Stomachaches as a Side Effect of Their Treatment Versus Adolescents With No Experience With Stomachaches as a Side Effect of Their Treatment**

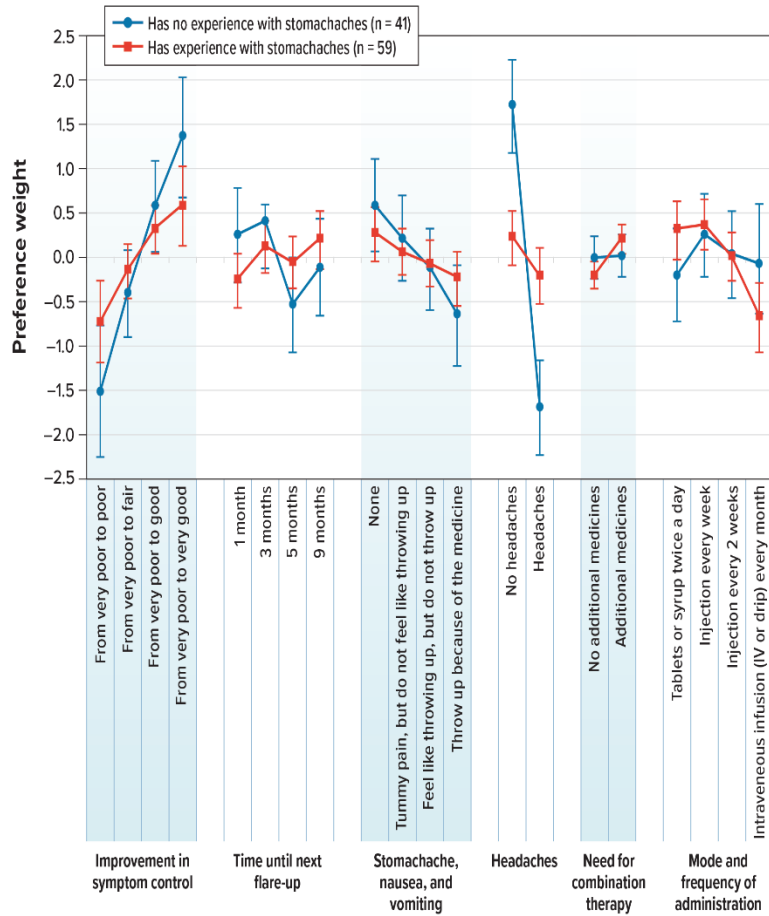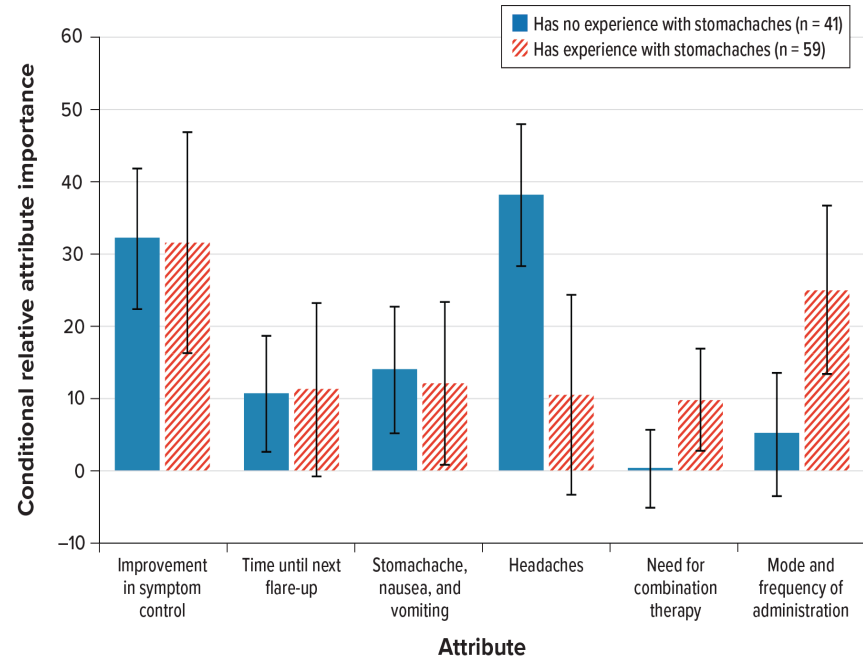

IV = intravenous.

**Figure S25. Preference Weights and Conditional Relative Importance Estimates: Adolescents Who Have Experienced Vomiting as a Side Effect of Their Treatment Versus Adolescents With No Experience With Vomiting as a Side Effect of Their Treatment**

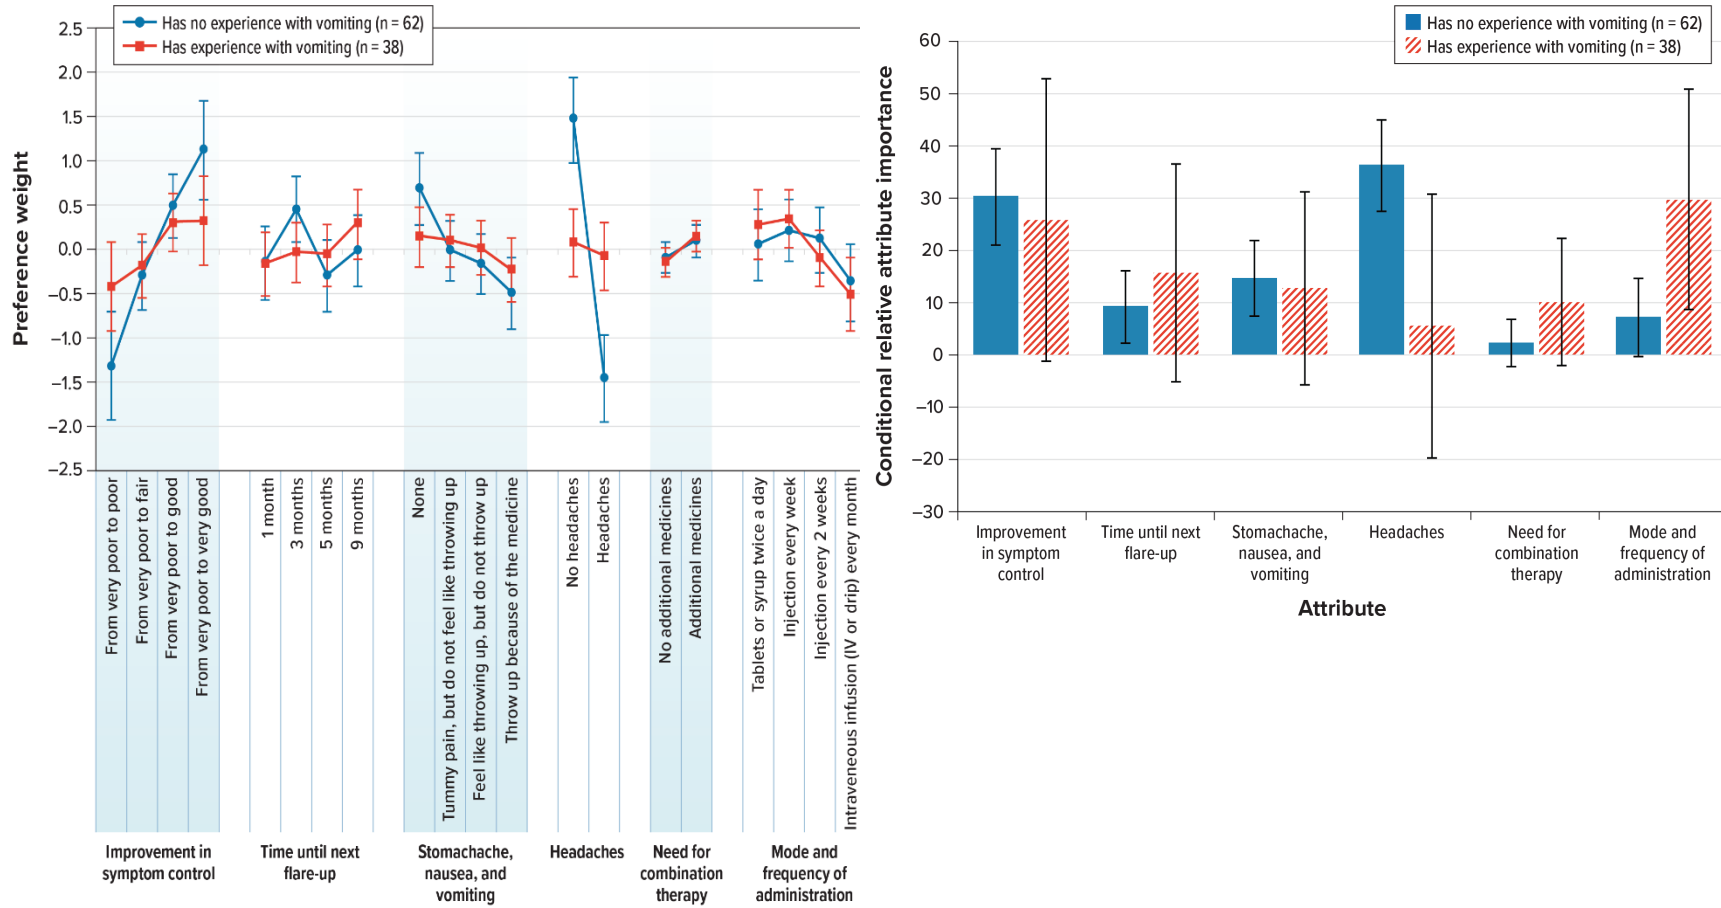

IV = intravenous.

**Figure S26. Preference Weights and Conditional Relative Importance Estimates: Caregivers With a Child Younger Than Median Age Versus Caregivers With a Child at or Older Than Median Age**

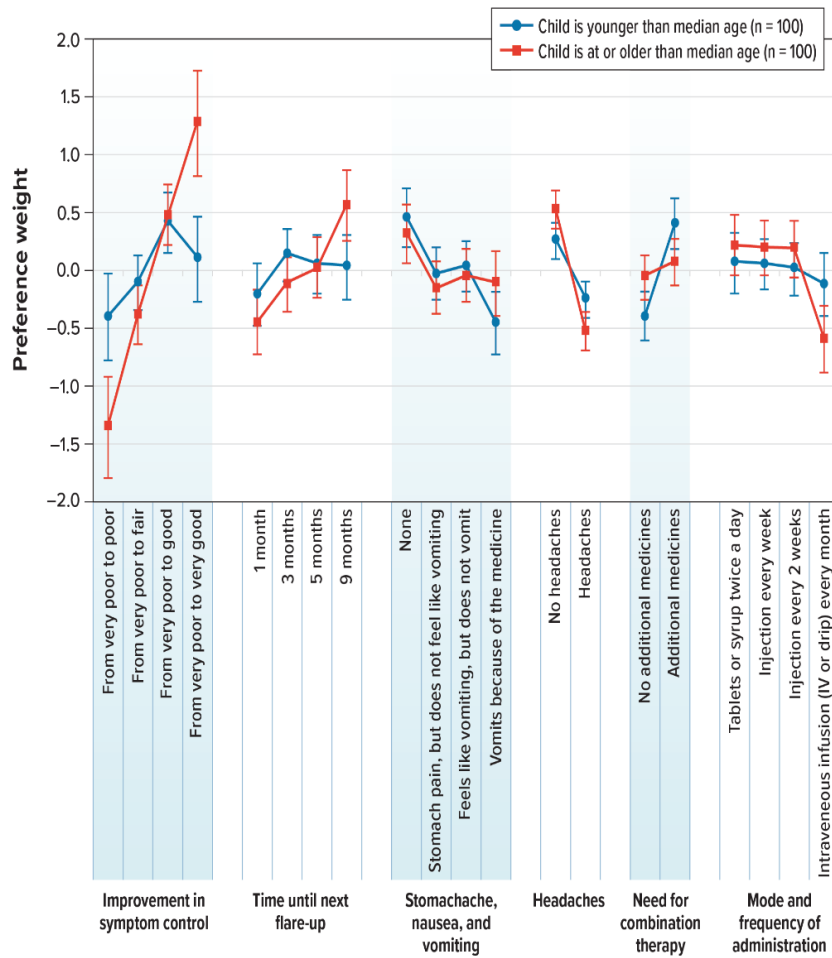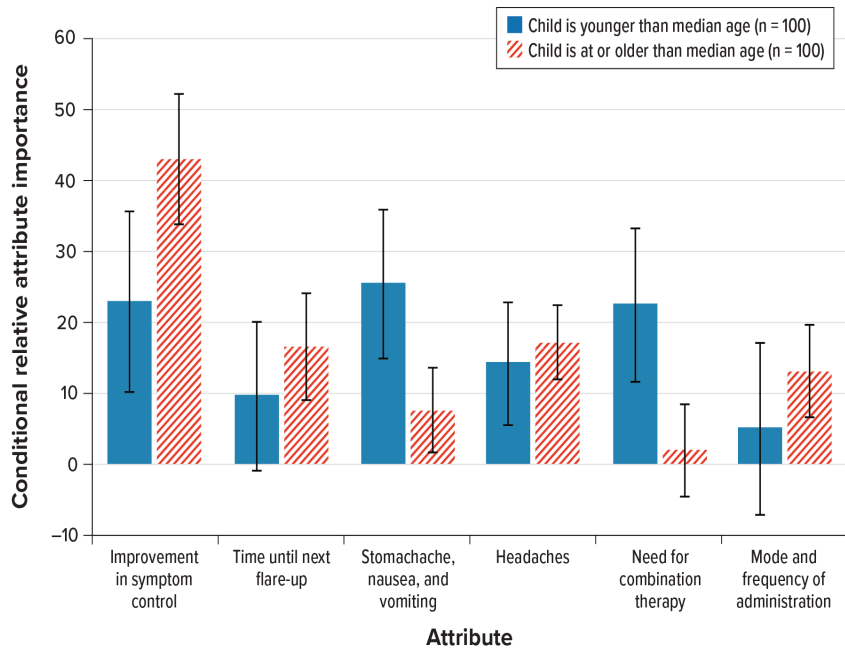

IV = intravenous.

**Figure S27. Preference Weights and Conditional Relative Importance Estimates: Caregivers With a Child Who Identifies as Female Versus Caregivers With a Child Who Does Not Identify as Female**

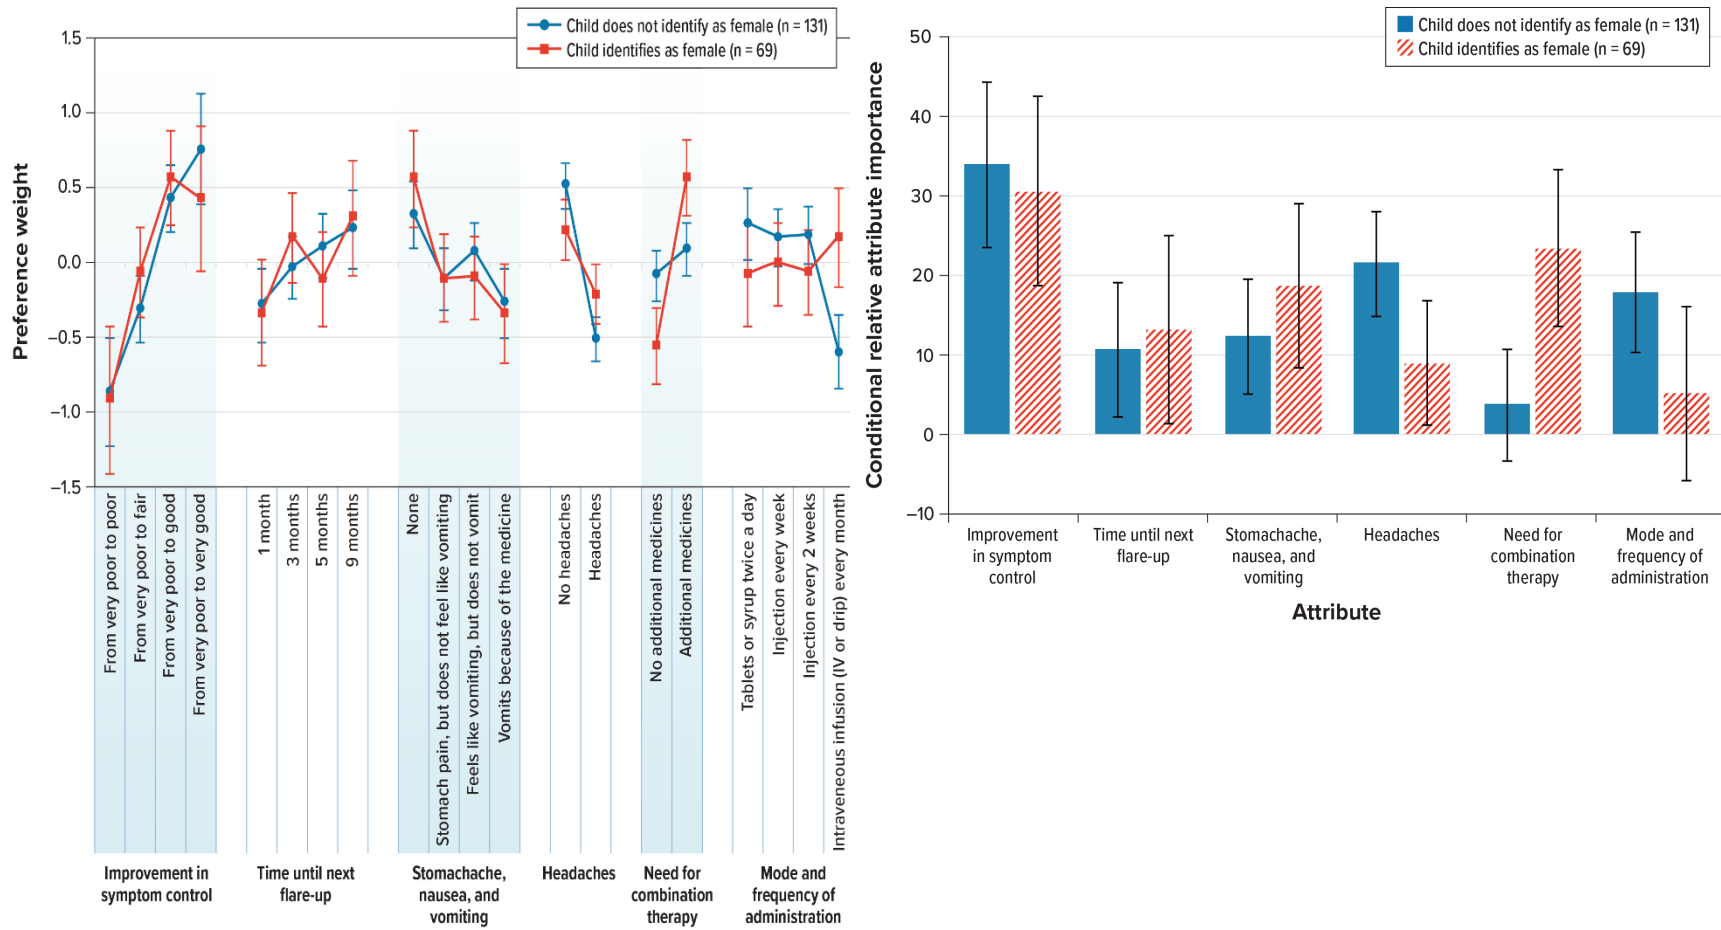

IV = intravenous.

**Figure S28. Preference Weights and Conditional Relative Importance Estimates: Caregivers With a 4-Year Degree or Higher Versus Caregivers With Less Than a 4-Year Degree**

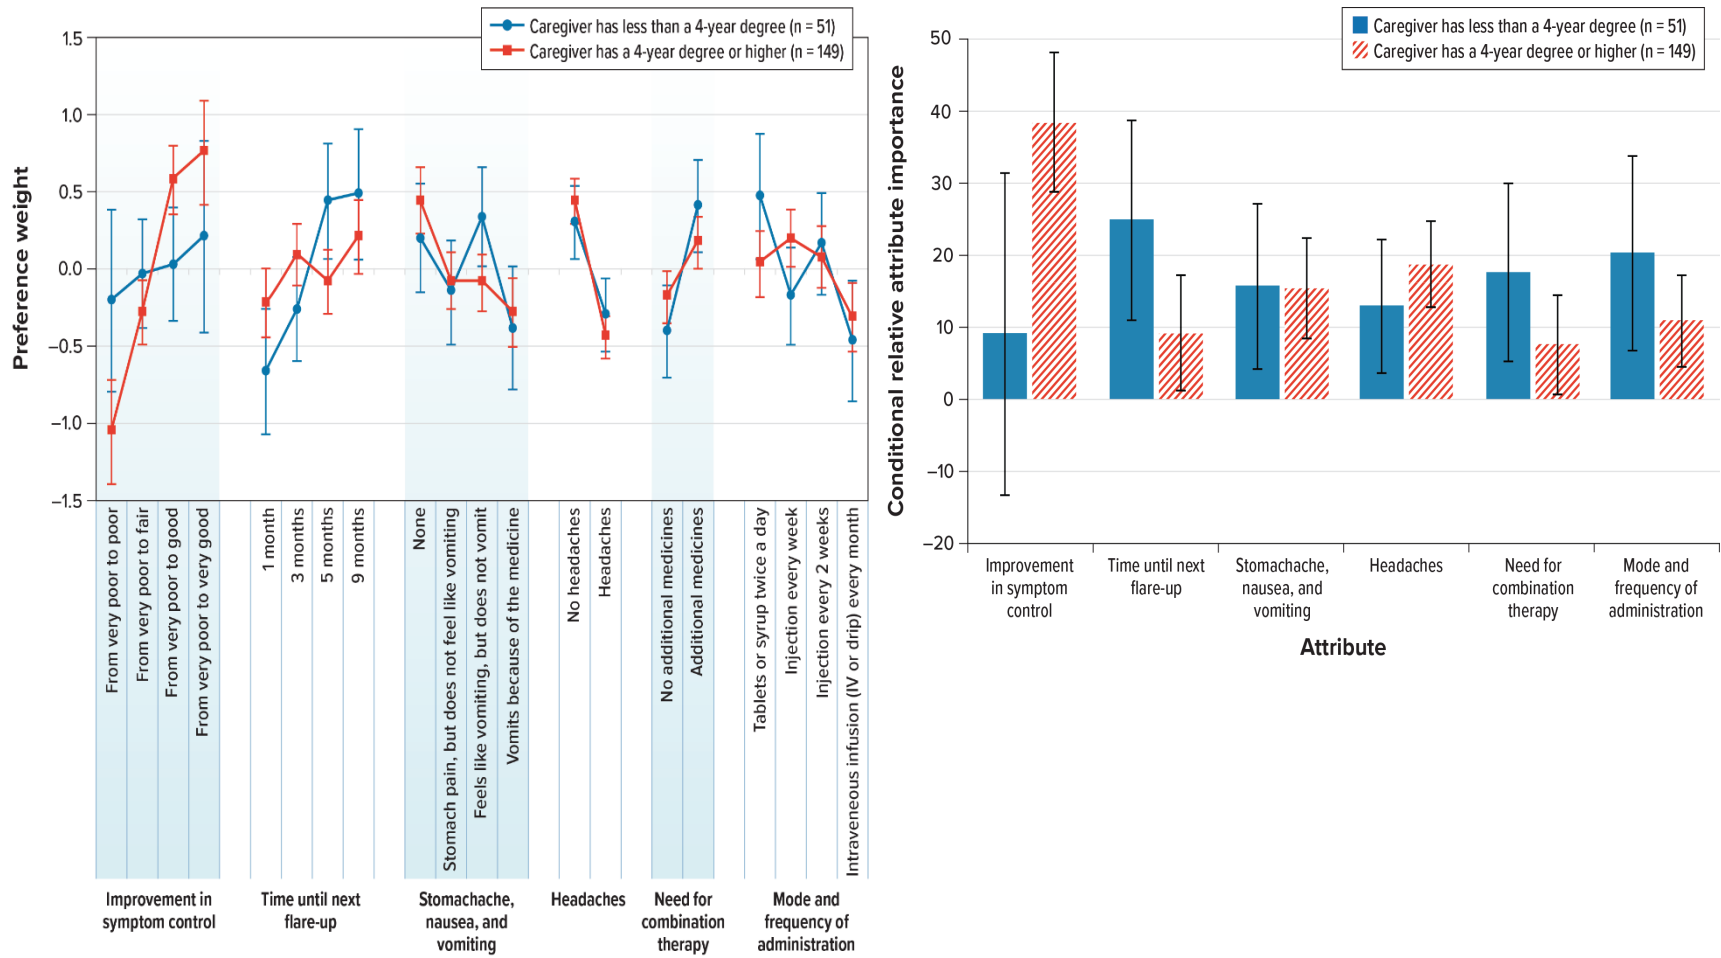

IV = intravenous.

**Figure S29. Preference Weights and Conditional Relative Importance Estimates: Caregivers With a Child Who Has Experience With Methotrexate Versus Caregivers With a Child Who Has No Experience With Methotrexate**

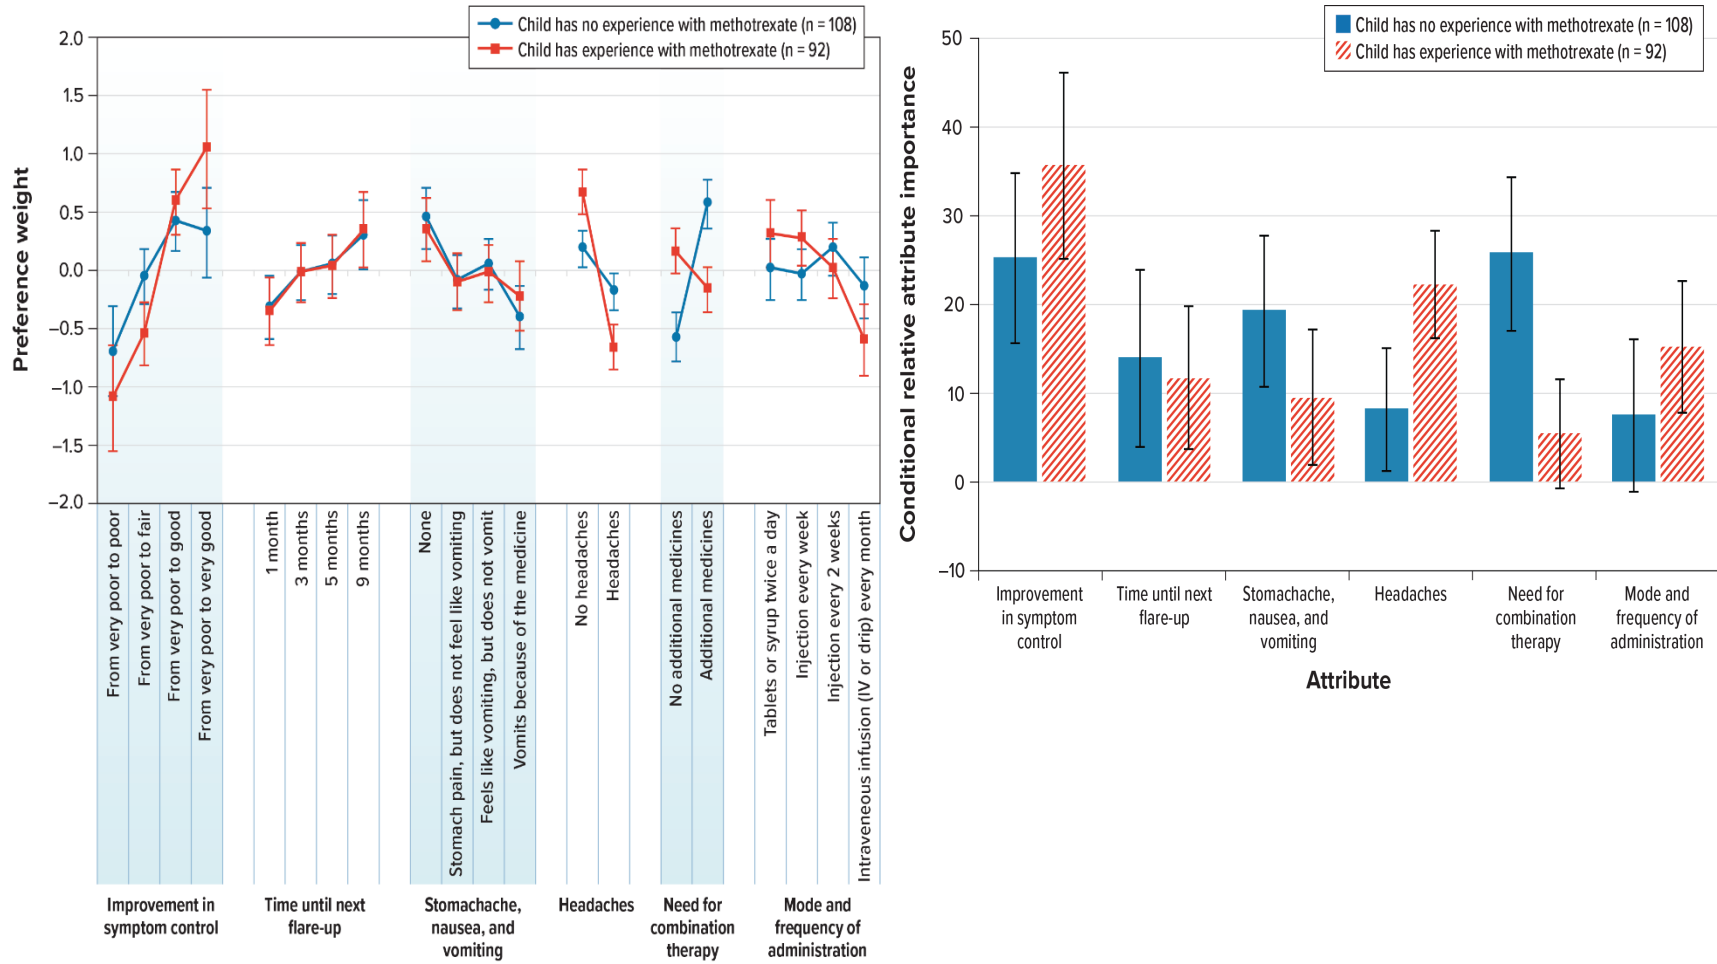

IV = intravenous.

**Figure S30. Preference Weights and Conditional Relative Importance Estimates: Caregivers With a Child Who Has Experience With Biologics Versus Caregivers With a Child Who Has No Experience With Biologics**

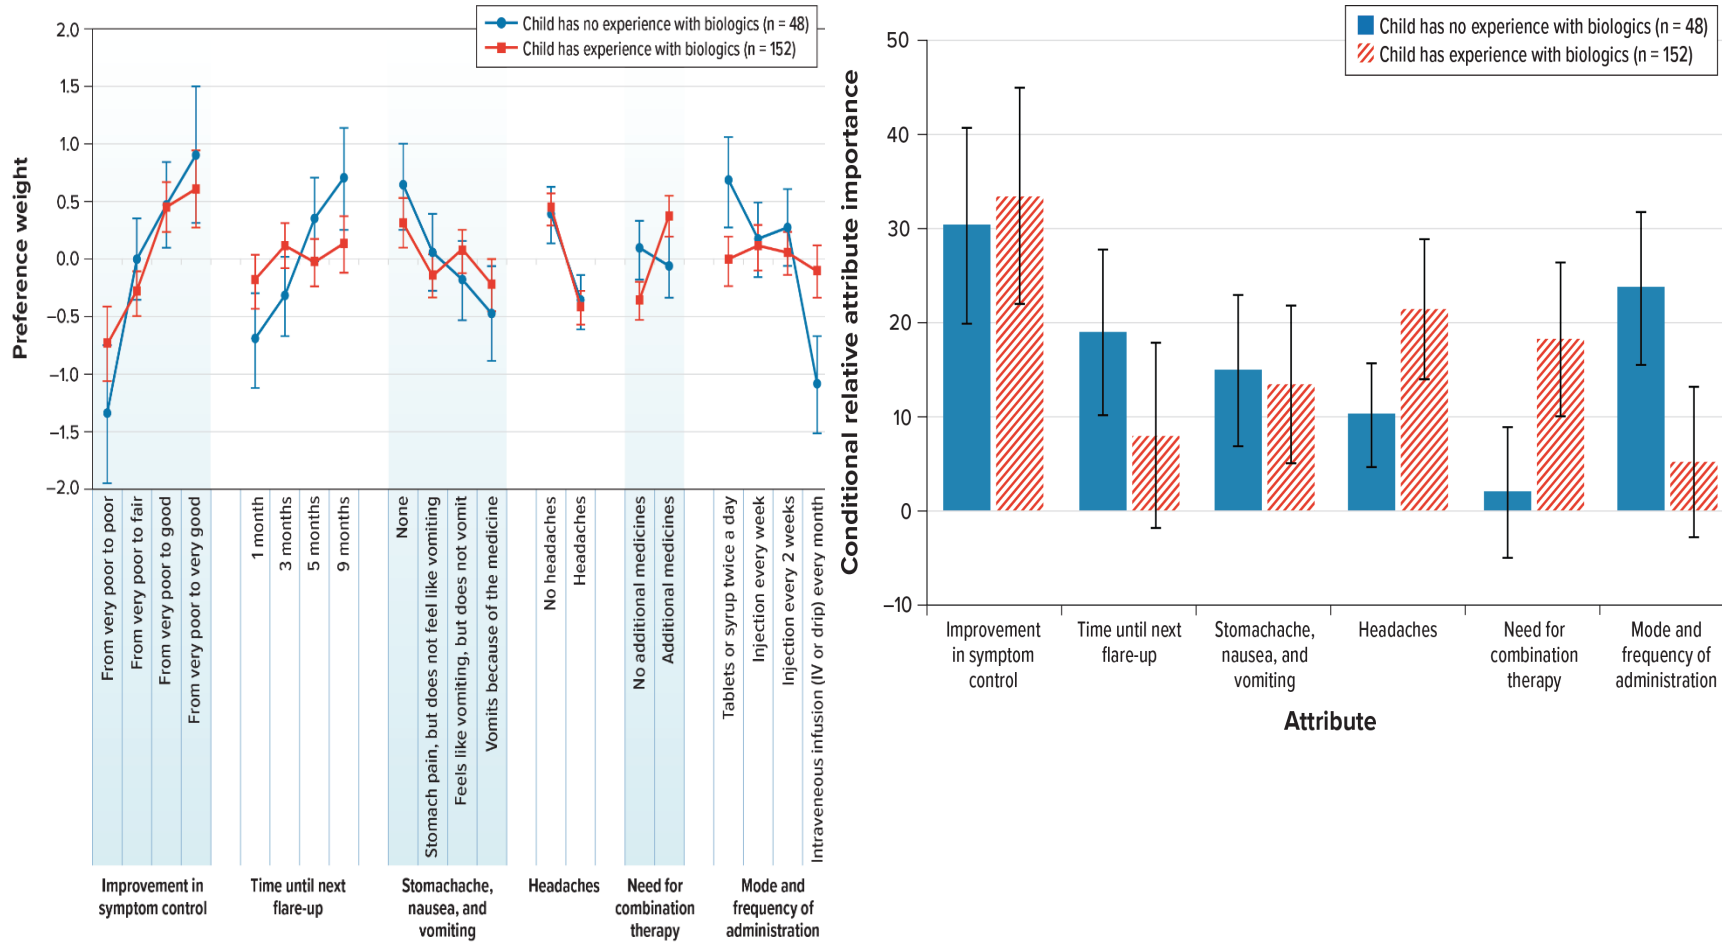

IV = intravenous.

**Figure S31. Preference Weights and Conditional Relative Importance Estimates: Caregivers With a Child Who Has Experience With Injections Versus Caregivers With a Child Who Has No Experience With Injections**

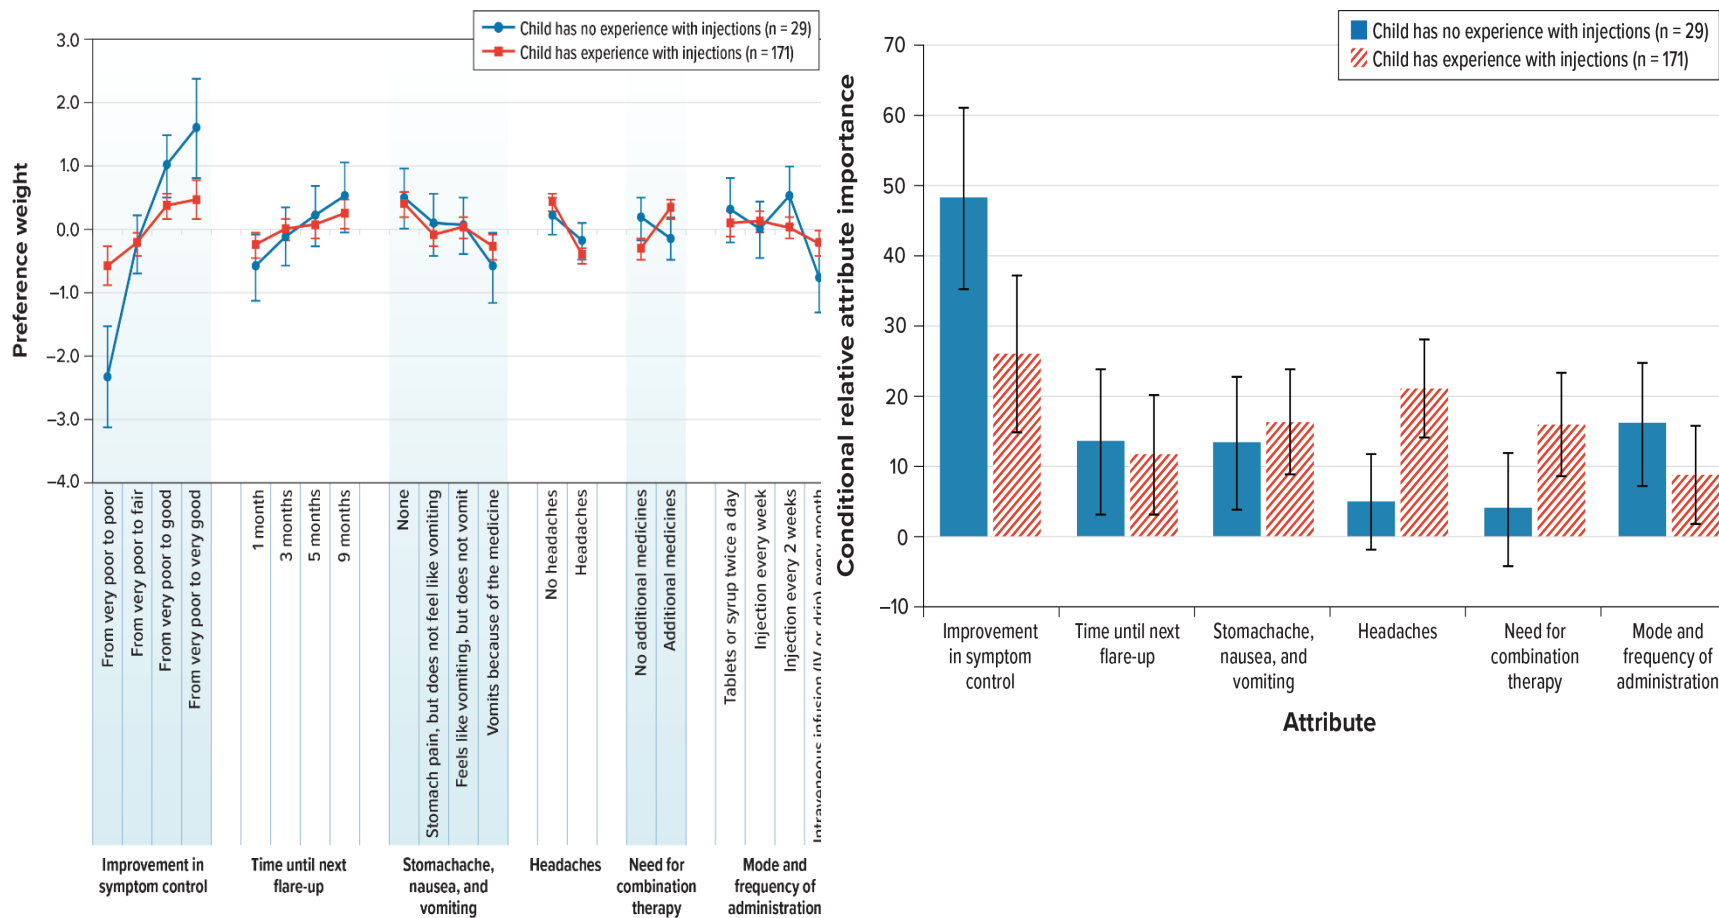

IV = intravenous.



**Figure S32. Preference Weights and Conditional Relative Importance Estimates: Caregivers With a Child Who Has Experience With Headaches as a Side Effect of Their Treatment Versus Caregivers With a Child Who Has No Experience With Headaches as a Side Effect of Their Treatment**

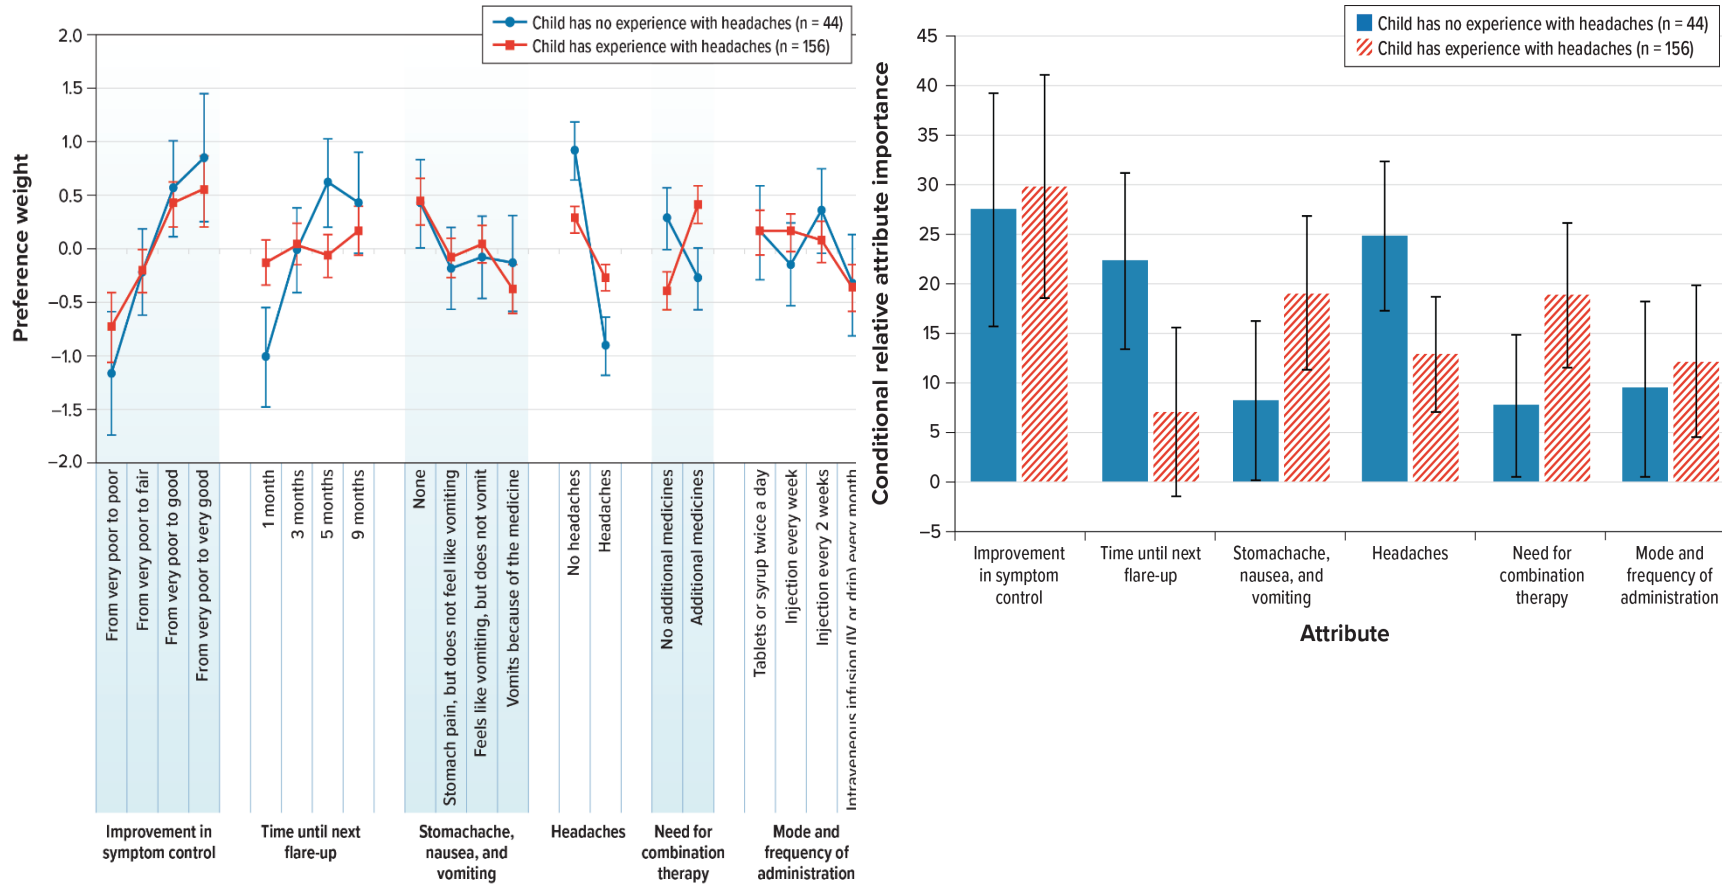

IV = intravenous.

**Figure S33. Preference Weights and Conditional Relative Importance Estimates: Caregivers With a Child Who Has Experience With Stomachaches as a Side Effect of Their Treatment Versus Caregivers With a Child Who Has No Experience With Stomachaches as a Side Effect of Their Treatment**

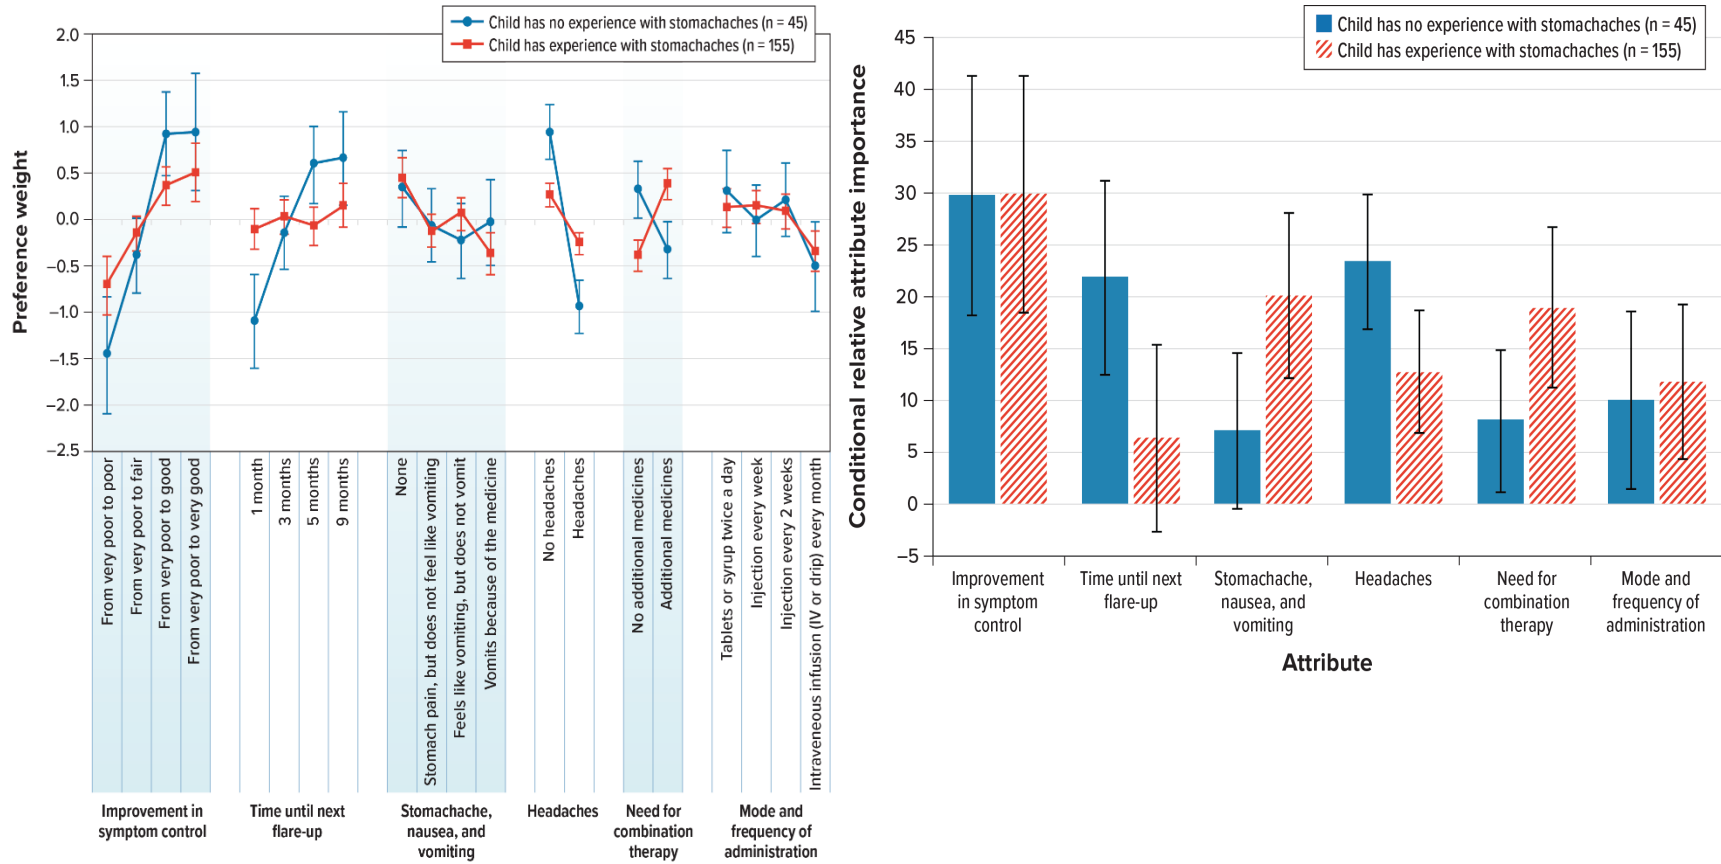

IV = intravenous.

**Figure S34. Preference Weights and Conditional Relative Importance Estimates: Caregivers With a Child Who Has Experience With Vomiting as a Side Effect of Their Treatment Versus Caregivers With a Child Who Has No Experience With Vomiting as a Side Effect of Their Treatment**

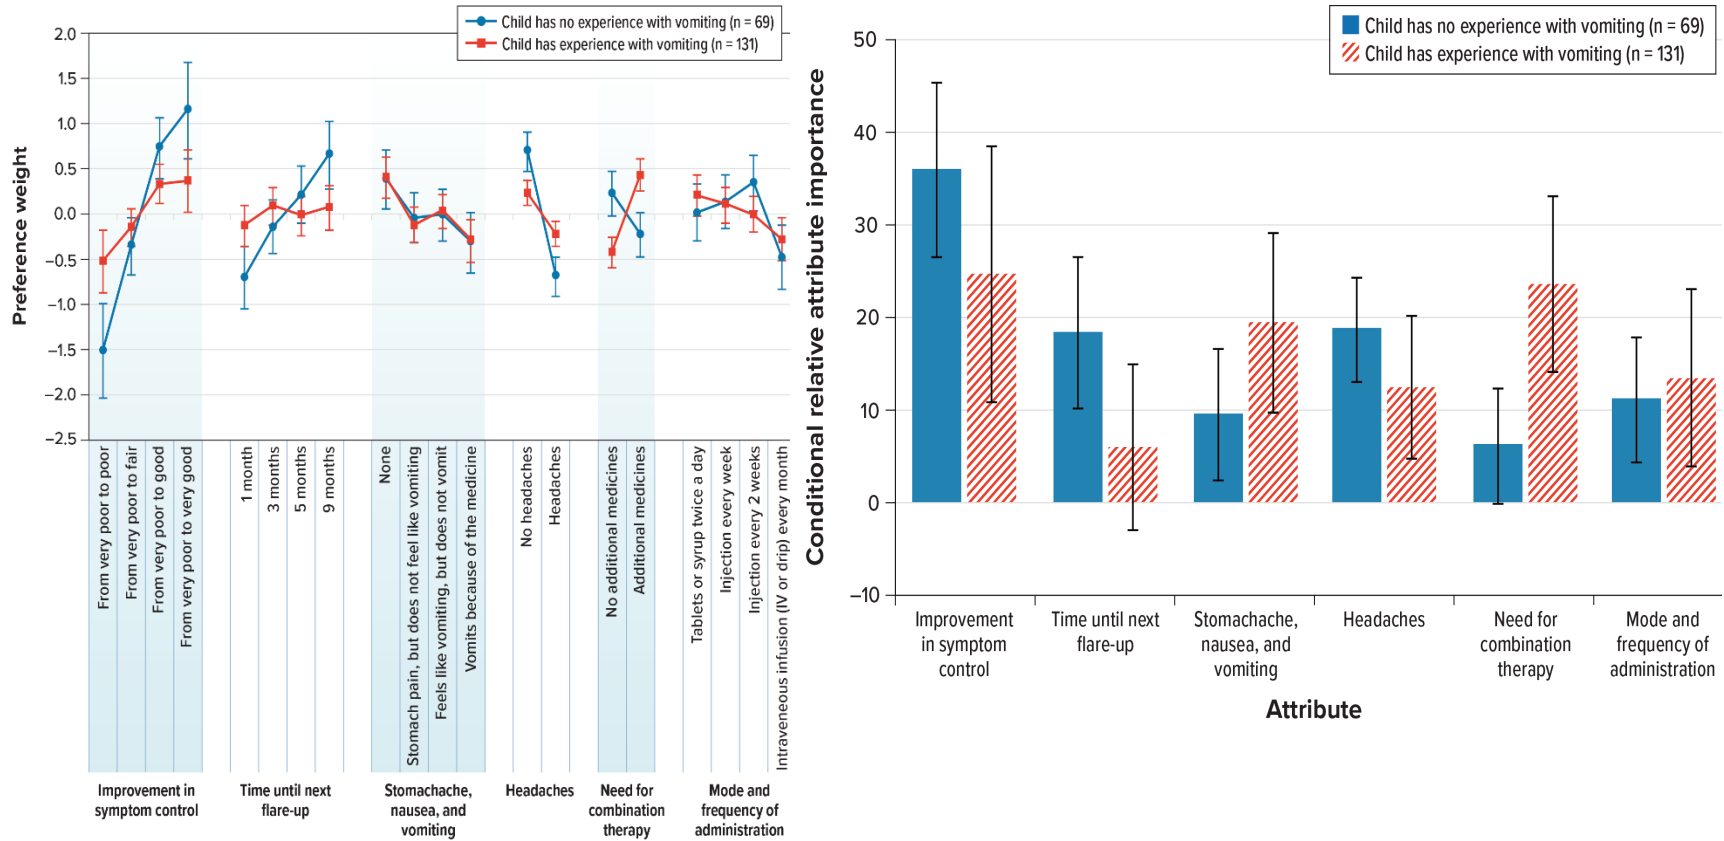

IV = intravenous.
